1 **Database for drug metabolism and comparisons, NICEdrug.ch, aids discovery and design**

2

3 **Authors/affiliation**

4 Homa MohammadiPeyhani<sup>1</sup>, Anush Chiappino-Pepe<sup>1,2,5</sup>, Kiandokht Haddadi<sup>1,3,5</sup>, Jasmin  
5 Hafner<sup>1</sup>, Noushin Hadadi<sup>1,4</sup>, Vassily Hatzimanikatis<sup>1,\*</sup>

6

7 <sup>1</sup>Laboratory of Computational Systems Biotechnology, École Polytechnique Fédérale de  
8 Lausanne, EPFL, Lausanne, Switzerland

9 <sup>2</sup>Present address: Department of Genetics, Harvard Medical School, Boston, Massachusetts,  
10 USA

11 <sup>3</sup>Present address: Department of Chemical Engineering and Applied Chemistry, University of  
12 Toronto, Toronto, Canada

13 <sup>4</sup>Present address: Department of Cell Physiology and Metabolism, Université de Genève,  
14 Geneva, Switzerland

15 <sup>5</sup>These authors contributed equally

16

17 \*Corresponding author:

18 Prof. Vassily Hatzimanikatis

19 Laboratory of Computational Systems Biotechnology (LCSB), École Polytechnique Fédérale de  
20 Lausanne (EPFL), CH-1015

21 Lausanne, Switzerland

22 Email: [vassily.hatzimanikatis@epfl.ch](mailto:vassily.hatzimanikatis@epfl.ch) , Phone: +41 (0)21 693 98 70, Fax: +41 (0)21 693 98 75

23

24 **Abstract**

25 The discovery of a drug requires over a decade of enormous research and financial  
26 investments—and still has a high risk of failure. To reduce this burden, we developed the  
27 NICEdrug.ch database, which incorporates 250,000 bio-active molecules, and studied their  
28 metabolic targets, fate, and toxicity. NICEdrug.ch includes a unique fingerprint that identifies  
29 reactive similarities between drug-drug and drug-metabolite pairs. We use NICEdrug.ch to  
30 evaluate inhibition and toxicity by the anticancer drug 5-fluorouracil, and suggest avenues to  
31 alleviate its side effects. Clustering based on this fingerprint in statins identified drugs for  
32 repurposing. We propose shikimate 3-phosphate for targeting liver-stage malaria with

33 minimal impact on the human host cell. Finally, NICEdrug.ch suggests over 1,300 drugs and  
34 food molecules to target COVID-19 and explains their inhibitory mechanisms. The  
35 NICEdrug.ch database is accessible online to systematically identify the reactivity of small  
36 molecules and druggable enzymes with practical applications in lead discovery and drug  
37 repurposing.

38

### 39 **Keywords**

40 Ligand-based drug discovery, drug clustering, drug metabolic fate, prodrug, drug similarity,  
41 drug toxicity, drug side effects, reactive site similarity, enzyme inhibition, nutraceuticals.

42

### 43 **Introduction**

44 To assure effective therapies for previously untreated illness, emerging diseases, and  
45 personalized medicine, new small molecules are always needed. However, the process to  
46 develop new drugs is complex, costly, and time consuming. This is especially problematic  
47 considering about 90% of drug candidates in clinical trials are discarded due to unexpected  
48 toxicity or other secondary effects. This inefficiency threatens our health care system and  
49 economy (Wong et al., 2019). Improving how we discover and design new drugs could reduce  
50 the time and costs involved in the developmental pipeline and hence is of primary importance  
51 to define efficient medical therapies.

52

53 Current drug discovery techniques often involve high-throughput screens with candidates  
54 and a set of target enzymes presumably involved in a disease, which leads to the selection for  
55 those candidates with the preferred activity. However, the biochemical space of small  
56 molecules and possible targets in the cell is huge, which limits the possible experimental  
57 testing. Computational methods for drug pre-screening and discovery are therefore  
58 promising. *In silico*, one can systematically search the maximum biochemical space for targets  
59 and molecules with desired structures and functions to narrow down the molecules to test  
60 experimentally.

61

62 There are two main *in silico* strategies for drug discovery: a data-driven approach based on  
63 machine learning, or a mechanistic approach based on the available biochemical knowledge.  
64 Machine learning (ML) has been successfully used in all stages of drug discovery, from the

65 prediction of targets to the discovery of drug candidates, as shown in some recent studies  
66 (Shilo et al., 2020; Stokes et al., 2020; Vamathevan et al., 2019). However, ML approaches  
67 require big, high-quality data sets of drug activity and associated physiology (Vamathevan et  
68 al., 2019), which might be challenging to obtain when studying drug action mechanisms and  
69 side effects in humans. ML also uses trained neural networks, which can lack interpretability  
70 and repeatability. This can make it difficult to explain why the neural networks has chosen a  
71 specific result, why it unexpectedly failed for an unseen dataset, and the final results may vary  
72 (Vamathevan et al., 2019).

73  
74 Mechanistic-based approaches can also rationally identify small molecules in a desired system  
75 and do not require such large amounts of data. Such methods commonly screen based on  
76 structural similarity to a native enzyme substrate (antimetabolite) or to a known drug (for  
77 drug repurposing), considering the complete structure of a molecule to extract information  
78 about protein-ligand fitness (Jarvis and Ouvry, 2019; Verlinde and Hol, 1994). However,  
79 respecting enzymatic catalysis, the reactive sites and neighboring atoms play a more  
80 important role than the rest of the molecule when assessing molecular reactivity (Hadadi et  
81 al., 2019). Indeed, reactive site-centric information might allow to identify: (1) the metabolic  
82 fate and neighbors of a small molecule (Javdan et al., 2020), including metabolic precursors  
83 or prodrugs and products of metabolic degradation, (2) small molecules sharing reactivity  
84 (Lim et al., 2010), and (3) competitively inhibited enzymes (Ghattas et al., 2016). Furthermore,  
85 neither ML nor mechanistic-based approaches consider the metabolism of the patient, even  
86 though the metabolic fate of the drug and the existence of additional targets in the cell might  
87 give rise to toxicity. To our knowledge, no available method accounts for human biochemistry  
88 when refining the search for drugs.

89  
90 In this study, we present the development of the NICEdrug.ch database using a more holistic  
91 and updated approach to a traditional mechanistic-based screen by (1) adding a more  
92 detailed analysis of drug molecular structures and target enzymes based on structural aspects  
93 of enzymatic catalysis and (2) accounting for drug metabolism in the context of human  
94 biochemistry. NICEdrug.ch assesses the similarity of the reactivity between a drug candidate  
95 and a native substrate of an enzyme based on their common reactive sites and neighboring  
96 atoms (i.e., the NICEdrug score) in an analogous fashion as the computational tool BridgIT

97 (Hadadi et al., 2019). It also identifies all biochemical transformations in the cellular  
98 metabolism that can modify and degrade a drug candidate using a previously developed  
99 reaction prediction tool, termed Biochemical Network Integrated Computational Explorer  
100 (BNICE.ch) (Hatzimanikatis et al., 2005; Soh and Hatzimanikatis, 2010) and the ATLAS of  
101 Biochemistry (Hadadi et al., 2016; Hafner et al., 2020). With NICEdrug.ch, we automatically  
102 analyzed the functional, reactive, and physicochemical properties of around 250,000 small  
103 molecules to suggest the action mechanism, metabolic fate, toxicity, and possibility of drug  
104 repurposing for each compound. We apply NICEdrug.ch to study drug action mechanisms and  
105 identify drugs for repurposing related to four diseases: cancer, high cholesterol, malaria, and  
106 COVID-19. We also sought for molecules in food, as available in foodDB the largest database  
107 of food constituents (Scalbert et al., 2011), with putative anti SARS-CoV-2 activity. Finally, we  
108 provide NICEdrug.ch as an online resource ([https://lcsb-databases.epfl.ch/pathways/  
109 Nicedrug/](https://lcsb-databases.epfl.ch/pathways/Nicedrug/)). Overall, NICEdrug.ch combines knowledge of molecular structures, enzymatic  
110 reaction mechanisms (as included in BNICE.ch (Finley et al., 2009; Hadadi and Hatzimanikatis,  
111 2015; Hatzimanikatis et al., 2005; Henry et al., 2010; Soh and Hatzimanikatis, 2010; Tokic et  
112 al., 2018)), and cellular biochemistry (currently human, *Plasmodium*, and *Escherichia coli*  
113 metabolism) to provide a promising and innovative resource to accelerate the discovery and  
114 design of novel drugs.

115

## 116 **Results**

### 117 ***Discovery of 200,000 bioactive molecules one reaction away from known drugs in a human 118 cell for analysis of drug metabolism with NICEdrug.ch***

119 To build the initial NICEdrug.ch database, we gathered over 70,000 existing small molecules  
120 presumed suitable for treating human diseases from three source databases: KEGG, ChEMBL,  
121 and DrugBank (Figure S1, Materials and Methods). We eliminated duplicate molecules,  
122 curated available information, computed thermodynamic properties, and applied the Lipinski  
123 rules (Lipinski et al., 2001) to keep only the molecules that have drug-like properties in  
124 NICEdrug.ch (Figure 1, Materials and Methods). NICEdrug.ch currently includes 48,544 unique  
125 small molecules from the source databases.

126

127 To evaluate the reactivity of the 48,544 drugs, we searched for all possible reactive sites on  
128 each drug with BNICE.ch (Hatzimanikatis et al., 2005) (Figure 1, Materials and Methods). All

129 of the 48,544 drugs contain at least one reactive site and hence might be reactive in a cell. In  
130 total, we identified more than 5 million potential reactive sites (183k unique) on the 48,544  
131 molecules and matched them to a corresponding enzyme by assigning them to an Enzyme  
132 Commission (E.C.) number. All of these enzymes belong to the human metabolic network  
133 (Table S1, Materials and Methods). Interestingly, 10.4% of identified reactive sites  
134 correspond to the p450 class of enzymes, which are responsible for breaking down  
135 compounds in the human body by introducing reactive groups on those compounds, also  
136 known as phase I of drug metabolism (Figure S2A). The sites that were identified varied  
137 greatly from simple and small (i.e., comprising a minimum number of one atom) to more  
138 complex sites that covered a large part of the molecule. The biggest reactive site includes  
139 30 atoms (Figure S2B).

140  
141 Given the important role of metabolism in the biochemical transformations and toxicity of  
142 drugs, we investigated the metabolism of the 48,544 input molecules in human cells. We  
143 predicted the hypothetical biochemical neighborhoods of all NICEdrug.ch small molecules in  
144 a human cell (i.e., reacting with known human metabolites and cofactors) using a retro-  
145 biosynthetic analysis with BNICE.ch (Figure 1, Table S1, Materials and Methods). With this  
146 approach, we discovered 197,246 unique compounds connected to the input drugs via one  
147 step or reaction (products of the first generation), and the associated hypothetical  
148 biochemical neighborhood consists of 630,449 reactions (Figure S2). The 197,246 unique  
149 compounds are part of a new set of bioactive molecules in NICEdrug.ch that might act as  
150 drugs or prodrugs in a human cell. We stored the total number of 245,790 small molecules  
151 (including the curated set of 48,544 drugs and the new set of 197,246 bioactive compounds),  
152 their calculated properties, and biochemistry in our open-access database of drug  
153 metabolism, NICEdrug.ch.

154  
155 To use NICEdrug.ch to identify drug-drug or drug-metabolite pairs that have shared reactivity  
156 and target enzymes, we developed a new metric called the *NICEdrug score* (Figure S3). The  
157 NICEdrug score uses information about the structure of the reactive site and its surroundings  
158 (as computed using the BridgIT methodology) and is stored in the form of a fingerprint  
159 (Materials and Methods). The fingerprint of a molecule's reactive site and the neighborhood  
160 around this reactive site—termed the *reactive site-centric fingerprint*—serves to compare this

161 site-specific similarity with other molecules. We recently showed that the reactive site-centric  
162 fingerprint of a reaction provides a better predictive measure of similar reactivity than the  
163 overall molecular structure, as the overall structure can be much larger than the reactive site  
164 and skew the results by indicating high similarities when the reactivity is actually quite  
165 different (Hadadi et al., 2019). Here, we generated reactive site-centric fingerprints for all 20  
166 million reactive sites identified in the 48,544 drugs and 197,246 one-step-away molecules  
167 included in NICEdrug.ch. The 20 million reactive site-centric fingerprints for the total 245,790  
168 small molecules are available in NICEdrug.ch to be used in similarity comparisons and  
169 classifying molecules (Materials and Methods).

170  
171 We propose the usage of NICEdrug.ch to generate reports that define the hypothetical  
172 reactivity of a molecule, the molecule's reactive sites as identified by target enzymes, and the  
173 NICEdrug score between drug-drug and drug-metabolite pairs. The NICEdrug.ch reports can  
174 be used for three main applications: (1) to identify the metabolism of small molecules; (2) to  
175 suggest drug repurposing; and (3) to evaluate the druggability of an enzyme in a desired cell  
176 or organism (Figure 1), as we show in the next sections. Currently, NICEdrug.ch includes  
177 metabolic information for human cells, a malaria parasite, and *Escherichia coli*, and it is easily  
178 extendible to other organisms in the future.

179  
180 ***NICEdrug.ch suggests inhibitory mechanisms of the anticancer drug 5-FU and avenues to***  
181 ***alleviate its toxicity.***

182 As a case study, we used NICEdrug.ch to investigate the mode of action and metabolic fate of  
183 one of the most commonly used drugs to treat cancer, 5-fluorouracil (5-FU), by exploring its  
184 reactivity and the downstream products or intermediates that are formed during the cascade  
185 of biochemical transformations. 5-FU interferes with DNA synthesis as an antimetabolite  
186 (Longley et al., 2003), meaning that its various intermediates like 5-fluorodeoxyuridine  
187 monophosphate (FdUMP) are similar enough to naturally occurring substrates and they can  
188 act as competitive inhibitors in the cell.

189  
190 We therefore used NICEdrug.ch to study the intermediates of 5-FU that occurred between  
191 one to four reaction steps away from 5-FU (Table S2), which is a reasonable range to occur in  
192 the body after 5-FU treatment (Testa, 2010). This analysis identified 407 compounds (90

193 biochemical and 317 chemical molecules) that have the biochemical potential to inhibit  
194 certain enzymes. Because the NICEdrug score that analyses reactive site and neighborhood  
195 similarities can serve as a better predictor of metabolite similarity, we assessed the NICEdrug  
196 score of the intermediates compared to human metabolites. This resulted in a wide range of  
197 NICEdrug scores between the different 5-FU intermediates and human metabolites, ranging  
198 from no similarity at a NICEdrug score of 0 to the equivalent substructure on a compound at  
199 a NICEdrug score of 1. More importantly, some of the 407 metabolite inhibitors (as explained  
200 next) were known compounds that have been investigated for their effects on 5-FU toxicity,  
201 but most of these compounds were newly identified by NICEdrug.ch and could therefore  
202 serve as avenues for future research into alleviating the side effects of this drug.

203

204 We investigated these 407 compounds in more detail, looking first at the set of already  
205 validated metabolite inhibitors. 5-Fluorouridine (two steps away from 5-FU) and UDP-L-  
206 arabinofuranose (four steps away from 5-FU) are very similar to uridine, with NICEdrug scores  
207 of 0.95 and 1, respectively. Uridine is recognized as a substrate by two human enzymes,  
208 cytidine deaminase (EC: 3.5.4.5) and 5'-nucleotidase (EC: 3.1.3.5) (Figure 2). Therefore,  
209 NICEdrug.ch predictions show that the degradation metabolism of 5-FU generates  
210 downstream molecules similar to uridine, which likely leads to the inhibition of these two  
211 enzymes. This effect has already been investigated as a potential method for reducing the  
212 toxicity of 5-FU, wherein it was proposed that high concentrations of uridine could compete  
213 with the toxic 5-FU metabolites (Ma et al., 2017).

214

215 NICEdrug.ch also identified a few potential metabolites that have not been previously studied  
216 for their effects. These metabolites share a reactive site with native human metabolites and  
217 differ in the reactive site neighborhood, and we refer to them as *para-metabolites* (Sartorelli  
218 and Johns, 2013). 6-Methyl-2'-deoxyadenosine, purine-deoxyribonucleoside, and 2'-  
219 deoxyisoguanosine structurally resemble the reactive site neighborhood of deoxyadenosine,  
220 with respective NICEdrug scores of 1, 1, and 0.91. Similarly, 2-aminoadenosine, 2-  
221 chloroadenosine, and 2-methylaminoadenosine (four steps from 5-FU) have the same  
222 reactive site neighborhood as adenosine, with NICEdrug scores of 1, 1, and 0.96, respectively.  
223 Adenosine and deoxyadenosine are both native substrates of the adenosine kinase (EC:  
224 2.7.1.20) and 5'-nucleotidase (EC: 3.1.3.5) (Figure 2). Therefore, we suggest that the 5-FU

225 derivatives 2-aminoadenosine and 2-chloroadenosine are competitive inhibitors for the two  
226 enzymes adenosine kinase and 5'-nucleotidase. With these new insights from NICEdrug.ch,  
227 we hypothesize that co-administering adenosine or deoxyadenosine and uridine (Figure 2)  
228 with 5-FU might be required to reduce its toxic effects and hopefully alleviate the side effects  
229 of the 5-FU cancer treatment.

230

231 ***Metabolic degradation of 5-FU leads to compounds with Fluor in their reactive site that***  
232 ***are less reactive and more toxic than other intermediates.***

233 In the previous case study, we showed inhibitors that contain the identical active site to the  
234 native enzyme. However, a slightly different reactive site might still be able to bind to an  
235 enzyme and compete with a native substrate, also defined as *anti-metabolite* (Matsuda et al.,  
236 2014). We explored this scenario by defining relaxed constraints in two steps. We first  
237 identified all atoms around a reactive site to compare the binding characteristics between the  
238 native molecule and putative inhibitor. Next, we compared the reactive site of the native  
239 molecule and putative inhibitor and scored the latter based on similarity (Materials and  
240 Methods). Following these two steps, we assessed the similarity between intermediates in  
241 the 5-FU metabolic neighborhood and human metabolites. Among all 407 compounds in the  
242 5-FU metabolism (Table S2), we found 8 that show a close similarity to human metabolites  
243 (NICEdrug score above 0.9, Figure 3) that might be competitive inhibitors or anti-metabolites.  
244 Inside the reactive site, the original hydrogen atom is bioisosterically replaced by fluorine. F-  
245 C bonds are extremely stable and therefore block the active site by forming a stable complex  
246 with the enzyme. The inhibitory effect of the intermediates tegafur, 5-fluorodeoxyuridine,  
247 and F-dUMP (one to two reaction steps away) has been confirmed in studies by Kobayakawa  
248 et.al (Kobayakawa and Kojima, 2011) and Bielas et.al (Bielas et al., 2009). In addition,  
249 NICEdrug.ch also predicts that 5flurim, 5-fluorodeoxyuridine triphosphate, 5-  
250 fluorodeoxyuridine triphosphate, 5-fluorouridine diphosphate, and 5-fluorouridine  
251 triphosphate, some of which occur further downstream in the 5-FU metabolism, also act as  
252 antimetabolites (Figure 3). Based on the insights from NICEdrug.ch, we suggest the inhibitory  
253 and side effect of 5-FU treatment might be more complex than previously thought. 5-FU  
254 downstream products are structurally close to human metabolites and might form stable  
255 complexes with native enzymes. This knowledge could serve to further refine the



256 pharmacokinetic and pharmacodynamic models of 5-FU and ultimately the dosage  
257 administered during treatment.

258

259 ***NICEdrug.ch identifies toxic alerts in the anticancer drug 5-FU and its products from***  
260 ***metabolic degradation.***

261 The concept of drug toxicity refers not to overdoses but instead to the toxic effects at medical  
262 doses (Guengerich, 2011), which often occur due to the degradation products generated  
263 through drug metabolism. Extensive efforts have been expended to identify toxic molecules  
264 or, more generally, to extract the substructures that are responsible for toxicity (called  
265 structural alerts). The Liver Toxicity Knowledge Base (LTKB) and the super toxic database  
266 include 1,036 and about 60k toxic molecules, respectively (Schmidt et al., 2009; Thakkar et  
267 al., 2018). ToxAlert provides around 1,200 alerts related to different forms of toxicity (Sushko  
268 et al., 2012). However, the number of molecules that are analyzed and labeled as toxic in  
269 databases is disproportionally low compared to the space of compounds. Additionally,  
270 structural alerts are indicated for many compounds, and current alerts might identify  
271 redundant and over-specific substructures, which questions their reliability (Yang et al.,  
272 2017).

273

274 To quantify the toxicity of downstream products of drugs in NICEdrug.ch, we collected all of  
275 the molecules cataloged as toxic in the LTKB and super toxic databases (approved toxic  
276 molecules) along with their lethal dose (LC<sub>50</sub>), as well as the existing structural alerts provided  
277 by ToxAlert. We measured the similarity of an input molecule with all approved toxic  
278 molecules using the reactive site-centric fingerprints implemented in BridgIT and the  
279 NICEdrug score (Materials and Methods). Next, we scanned both the toxic reference molecule  
280 and the input molecule for structural hints of toxicity, referred to here as *NICEdrug toxic*  
281 *alerts*. We kept common NICEdrug toxic alerts between the reference, which is a confirmed  
282 toxic compound, and input molecule. With this procedure in place, NICEdrug.ch finds for each  
283 input molecule the most similar toxic molecules along with their common toxic alerts and  
284 serves to assess the toxicity of a new molecule based on the mapped toxic alerts. Additionally,  
285 the NICEdrug toxic alerts and toxicity level of drug intermediates can be traced with  
286 NICEdrug.ch through the whole degradation pathway to reveal the origin of the toxicity.

287

288 As an example, we herein tested the ability of NICEdrug.ch to identify the toxicity in 5-FU  
289 metabolism. First, we queried the toxicity profile of all intermediates in the 5-FU metabolic  
290 neighborhood, integrating both known and hypothetical human reactions (Materials and  
291 Methods). In this analysis, we generated all compounds up to four steps away from 5-FU.  
292 Based on the toxicity report of each potential degradation product, we calculated a relative  
293 toxicity metric that adds the LC<sub>50</sub> value, NICEdrug score, and number of common NICEdrug  
294 toxic alerts with all approved toxic drugs (Materials and Methods). We generated the  
295 metabolic neighborhood around 5-FU, and labeled each compound with our toxicity metric  
296 (Table S2). Interestingly, we show that the top most toxic intermediates match the list of  
297 known three toxic intermediates in 5-FU metabolism (Figure 4) (Krauß and Bracher, 2018).  
298 Based on the toxicity analysis in NICEdrug.ch for 5-FU, we hypothesize there are highly toxic  
299 products of 5-FU drug metabolism that had not been identified either experimentally or  
300 computationally and it might be necessary to experimentally evaluate their toxicity to  
301 recalibrate the dosage of 5-FU treatment.

302

303 ***The NICEdrug reactive site-centric fingerprint accurately clusters statins of type I and II***  
304 ***and guides drug repurposing.***

305 Because potential side effects of a drug are documented when the drug passes the approval  
306 process, repurposing approved drugs for other diseases can reduce the medical risks and  
307 development expenses. For instance, the antitussive noscapine has been repurposed to treat  
308 some cancers (Mahmoudian and Rahimi-Moghaddam, 2009; Rajesh, A. and International,  
309 2011). Because NICEdrug.ch can search for functional (i.e., reactivity), structural (i.e., size),  
310 and physicochemical (i.e., solubility) similarities between molecules while accounting for  
311 human biochemistry, we wanted to determine if NICEdrug.ch could therefore suggest drug  
312 repurposing strategies.

313

314 As a case study, we investigated the possibility of drug repurposing to replace statins, which  
315 are a class of drugs often prescribed to lower blood cholesterol levels and to treat  
316 cardiovascular disease. Indeed, data from the National Health and Nutrition Examination  
317 Survey indicate that nearly half of adults 75 years and older in the United States use  
318 prescription cholesterol-lowering statins (US Preventive Services Task Force, 2016). Since  
319 some patients do not tolerate these drugs and many still do not reach a safe blood cholesterol

320 level (Kong et al., 2004), there is a need for alternatives. Being competitive inhibitors of the  
321 cholesterol biosynthesis enzyme 3-hydroxy-3-methyl-glutaryl-coenzyme A reductase (HMG-  
322 CoA reductase) (Jiang et al., 2018; Mulhaupt et al., 2003), all statins share the same reactive  
323 site. BNICE.ch labeled this reactive site, in a linear or circular form, as corresponding to an EC  
324 number of 4.2.1.- (Istvan, 2001). NICEdrug.ch includes 254 molecules with the same reactive  
325 site that are recognized by enzymes of E.C. class 4.2.1.-, ten of which are known statins. We  
326 used the NICEdrug score to cluster the 254 molecules into different classes (Table S3, Figure  
327 5). Two of the classes correspond to all currently known statins, which are classified based on  
328 their activity into type 1 and 2, wherein statins of type 2 are less active and their reactive site  
329 is more stable compared to type 1. This property is well distinguished in the clustering based  
330 on the NICEdrug score (Figure 5A).

331  
332 In addition to properly classifying the ten known statins (Figure 5B and 5C, molecules non-  
333 marked), we identified seven other NICEdrug.ch molecules that clustered tightly with these  
334 statins (Figure 5B and 5C, molecules marked with \*). These new molecules share the same  
335 reactive site and physicochemical properties, and they have the highest similarity with known  
336 statins in atoms neighboring the reactive site. In a previous study by Endo *et al.*, these seven  
337 NICEdrug.ch molecules were introduced as Mevastatin analogues for inhibiting cholesterol  
338 biosynthesis (Endo and Hasumi, 1993). Therefore, they were already suggested as possible  
339 candidates for treating high blood cholesterol and could be a good option for repurposing.  
340 Furthermore, we found eight known drugs not from the statin family among the 254 scanned  
341 molecules (Table S4). One of them, acetyl-L-carnitine (Figure 5C, molecule marked with \*\*),  
342 is mainly used for treating neuropathic pain (Li et al., 2015), though Tanaka *et al.* have already  
343 confirmed that it also has a cholesterol-reducing effect (Tanaka et al., 2004).

344  
345 Overall, NICEdrug.ch was able to characterize all known enzymatic reactions that metabolize  
346 statins, including proposed alternatives and new hypothetical reactions that could be  
347 involved in their metabolism within human cells (Figure 5A, Figure S4). The identification of  
348 seven drugs that clustered around the statins and were already designed as alternatives to  
349 statins verifies the ability of NICEdrug.ch and the NICEdrug score to search broad databases  
350 for similar compounds in structure and function. Furthermore, the discovery of the eight  
351 compounds unrelated to known statins offer multiple candidate repurposable drugs along

352 with a map of their metabolized intermediates for the treatment of high cholesterol, though  
353 further preclinical experiments would be required to verify their clinical benefits.

354

355 ***NICEdrug.ch suggests over 500 drugs to target liver-stage malaria and simultaneously***  
356 ***minimize side effects in human cells, with shikimate 3-phosphate as a top candidate***

357 Efficiently targeting malaria remains a global health challenge. Malaria parasites  
358 (*Plasmodium*) are developing resistance to all known drugs, and antimalarials cause many  
359 side effects (World Health Organization, 2018). We applied NICEdrug.ch to identify drug  
360 candidates that target liver-stage developing malaria parasites and lessen or avoid side effects  
361 in human cells.

362

363 We previously reported 178 essential genes and enzymes for liver-stage development in the  
364 malaria parasite *Plasmodium berghei* (Stanway et al., 2019) (Table S5, STAR Methods). Out of  
365 178 essential *Plasmodium* enzymes, 32 enzymes are not essential in human cells (Wang et al.,  
366 2015) (Table S5, STAR Methods). We extracted all molecules catalyzed by these 32 enzymes  
367 uniquely essential in *Plasmodium*, which resulted in 68 metabolites and 157 unique  
368 metabolite-enzyme pairs (Table S5, STAR Methods). We used NICEdrug.ch to examine the  
369 druggability of the 32 essential *Plasmodium* enzymes with the curated 48,544 drugs (Figure  
370 1) and the possibility of repurposing them to target malaria.

371

372 We considered as candidates for targeting liver-stage malaria as the drugs or their metabolic  
373 neighbors that show a good NICEdrug score (NICEdrug score above 0.5) with any of the 157  
374 *Plasmodium* metabolite-enzyme pairs. We identified 516 such drug candidates, targeting 16  
375 essential *Plasmodium* enzymes (Table S6, STAR Methods). Furthermore, 1,164 other drugs  
376 appear in the metabolic neighborhood of the 516 identified drugs (between one and three  
377 reaction steps away). Interestingly, out of the 516 identified drug candidates, digoxigenin,  
378 estradiol-17beta and estriol have been previously validated as antimalarials (Antonova-Koch  
379 et al., 2018) and NICEdrug.ch suggests their antimalarial activity relies on the competitive  
380 inhibition of the KRC enzyme (Figure 6). This enzyme is part of both the steroid metabolism  
381 and the fatty acid elongation metabolism, which we recently showed is essential for  
382 *Plasmodium* liver-stage development (Stanway et al., 2019). Among the 516 NICEdrug  
383 antimalarial candidates, there are also 89 molecules present in the metabolic neighborhood

384 of antimalarial drugs approved by (Antonova-Koch et al., 2018), which suggests these  
385 antimalarials might be prodrugs (Table S6).

386

387 Being an intracellular parasite, antimalarial treatments should be efficient at targeting  
388 *Plasmodium* as well as assure the integrity of the host cell (Figure 6A). To tackle this challenge,  
389 we identified 1,497 metabolites participating in metabolic reactions catalyzed with essential  
390 human enzymes (Table S5, STAR Methods) and excluded the antimalarial drug candidates that  
391 shared reactive site-centric similarity with the extracted human metabolite set (to satisfy  
392 NICEdrug score below 0.5). Out of all 516 drug candidates that might target liver-stage  
393 *Plasmodium*, a reduced set of 64 molecules minimize the inhibition of essential human  
394 enzymes (Table S6, STAR Methods) and are hence optimal antimalarial candidates.

395

396 Among our set of 64 optimal antimalarial candidates, a set of 14 drugs targeting the  
397 *Plasmodium* shikimate metabolism, whose function is essential for liver-stage malaria  
398 development (Stanway et al., 2019), arose as the top candidate because of its complete  
399 absence in human cells. The set of drugs targeting shikimate metabolism include 40 prodrugs  
400 (between one and three reaction steps away) that have been shown to have antimalarial  
401 activity (Antonova-Koch et al., 2018) (Table S6). NICEdrug.ch identified molecules among the  
402 prodrugs with a high number of toxic alerts, like nitrofen. It also identified four molecules  
403 with scaffolds similar (two or three steps away) to the 1-(4-chlorobenzoyl)pyrazolidin-3-one  
404 of shikimate and derivatives. This result suggests that downstream compounds of the 40  
405 prodrugs might target the *Plasmodium* shikimate pathway, but also might cause side effects  
406 in humans (Table S6).

407

408 To this end, NICEdrug.ch identified shikimate 3-phosphate as a top candidate antimalarial  
409 drug. We propose that shikimate 3-phosphate inhibits the essential *Plasmodium* shikimate  
410 biosynthesis pathway without side effects in the host cell (Figure 6, Table S6). Excitingly,  
411 shikimate 3-phosphate has been used to treat *E. coli* and *Streptococcus* infections without  
412 appreciable toxicity for patients (Díaz-Quiroz et al., 2018). Furthermore, recent studies have  
413 shown that inhibiting the shikimate pathway using 7-deoxy-sedoheptulose is an attractive  
414 antimicrobial and herbicidal strategy with no cytotoxic effects on mammalian cells (Brilisauer  
415 et al., 2019). Experimental studies should now validate the capability of shikimate 3-

416 phosphate to efficiently and safely target liver malaria, and could further test other  
417 NICEdrug.ch antimalarial candidates (Table S6).

418

419 ***NICEdrug.ch identifies over 1,300 molecules to fight COVID-19, with N-acetylcysteine as a***  
420 ***top candidate***

421 SARS-CoV-2 is responsible for the currently on-going COVID-19 pandemic and the death of  
422 around half a million people (as of today, June 15 (Dong et al., 2020)) and there is currently  
423 no confirmed treatment for it. Attacking the host factors that allow replication and spread of  
424 the virus is an attractive strategy to treat viral infections like COVID-19. A recent study has  
425 identified 332 interactions between SARS-CoV-2 proteins and human proteins, which involve  
426 332 hijacked human proteins or host factors (Gordon et al., 2020). Here, we first used  
427 NICEdrug.ch to identify inhibitors of enzymatic host factors of SARS-CoV-2. Targeting such  
428 human enzymes prevents interactions between human and viral proteins (PPI) (STAR  
429 Methods, Figure 7A). Out of the 332 hijacked human proteins we identified 97 enzymes (STAR  
430 Methods, Table S7) and evaluated their druggability by inhibitors among the 250,000 small  
431 molecules in NICEdrug.ch and 80,000 molecules in food (STAR Methods, Figure 7A).  
432 NICEdrug.ch suggests 22 hijacked human enzymes can be drug targets, and proposed 1301  
433 potential competitive inhibitors from the NICEdrug.ch database. Out of 1301 potential  
434 inhibitors, 465 are known drugs, 712 are active metabolic products of 1,419 one-step-away  
435 prodrugs, and 402 are molecules in fooDB (Table S7). We found among the top anti SARS-  
436 CoV-2 drug candidates the known reverse transcriptase inhibitor didanosine (Figure 7B, Table  
437 S7), which other *in silico* screenings have also suggested as a potential treatment for COVID-  
438 19 (Alakwaa, 2020; Cava et al., 2020). Among others, NICEdrug.ch also identified: (1)  
439 actodigin, which belongs to the family of cardiotonic molecules proven to be effective against  
440 MERS-CoV but without mechanistic knowledge (Ko et al., 2020), (2) three molecules in ginger  
441 (6-paradol, 10-gingerol, and 6-shogaol) inhibiting catechol methyltransferase, and (3)  
442 brivudine, a DNA polymerase inhibitor that has been used to treat herpes zoster (Wassilew,  
443 2005) and prevent MERS-CoV infection (Park et al., 2019), and NICEdrug.ch suggests it for  
444 repurposing (Figure S5, Table S7).

445

446 Drugs like remdesivir, EIDD-2801, favipiravir, and inhibitors of angiotensin converting enzyme  
447 2 (ACE2) have been used to treat COVID-19 (Jeon et al., 2020), and act through a presumably

448 effective inhibitory mechanism (Figure S6A). For instance, the three drugs remdesivir, EIDD-  
449 2801, and favipiravir are believed to inhibit the DNA-directed RNA polymerase (E.C: 2.7.7.6).  
450 Here, we used the NICEdrug reactive site-centric fingerprint to seek for alternative small  
451 molecules in NICEdrug.ch and foodDB that could be repurposed to target ACE2 and DNA-  
452 directed RNA polymerase. NICEdrug.ch identified a total of 215 possible competitive  
453 inhibitors of ACE2. Among those is captopril, a known ACE2 inhibitor (Kim et al., 2003), and  
454 D-leucyl-N-(4-carbamimidoylbenzyl)-L-prolinamide, a NICEdrug.ch suggestion for drug  
455 repurposing to treat COVID-19. We also found 39 food-based molecules with indole-3-acetyl-  
456 proline (a molecule in soybean) as top ACE2 inhibitor candidate (Figure S6A, Table S8). To  
457 target the same enzyme as remdesivir, EIDD-2801, and favipiravir, NICEdrug.ch identified  
458 1115 inhibitors of the DNA-directed RNA polymerase, like the drug vidarabine, which shows  
459 broad spectrum activity against DNA viruses in cell cultures and significant antiviral activity  
460 against infections like the herpes viruses, the vaccinia virus, and varicella zoster virus (Suzuki  
461 et al., 2006). We further found 556 molecules in food that might inhibit DNA-directed RNA  
462 polymerase, like trans-zeatin riboside triphosphate (FDB031217) (Table S8).

463  
464 One of the host factors identified by Gordon and co-workers is the histone deacetylase 2  
465 (HDAC2) (Gordon et al., 2020), which acetylates proteins and is an important transcriptional  
466 and epigenetic regulator. The acetyl and carboxylate moieties are the reactive sites of the  
467 forward (N6-acetyl-L-lysyl-[histone]) and reverse (acetate) biotransformation of HDAC2,  
468 respectively (Figure 7). NICEdrug.ch recognized a total of 640 drugs for repurposing that can  
469 inhibit HDAC2, including 311 drugs sharing the acetyl moiety and showing a NICEdrug score  
470 above 0.5 with respect to N6-acetyl-L-lysyl-[histone], and 329 drugs sharing the carboxylate  
471 moiety and presenting a NICEdrug score above 0.5 with acetate (STAR Methods). Among the  
472 drugs sharing the acetyl reactive site, we identified the known HDAC2 inhibitor melatonin  
473 (Wu et al., 2018), and to-our-knowledge new candidates like N-acetylhistamine and N-  
474 acetylcysteine. We also located 22 molecules in food with potential HDAC2 inhibitory activity,  
475 like N8-acetylspermidine (FDB022894) (Figure 7C, Table S8). Drugs sharing the carboxylate  
476 reactive site (as identified with NICEdrug) include the known HDAC2 inhibitors valproate,  
477 butyrate, phenyl butyrate (Abdel-Atty et al., 2014) and statins (Kong et al., 2004) (Figure 7C,  
478 Table S8). Interestingly, statins have been shown to have protective activity against SARS-  
479 CoV-2 (Lodigiani et al., 2020; Zhang et al., 2020). In addition and excitingly, the NICEdrug.ch

480 candidate N-acetylcysteine is a commonly used mucolytic drug that is sometimes considered  
481 as a dietary supplement and has putative antioxidant properties. Indeed, N-acetylcysteine is  
482 believed for long to be precursor of the cellular antioxidant glutathione (Mårtensson et al.,  
483 1989), but has unknown pharmacological action. NICEdrug.ch suggests that N-acetylcysteine  
484 might present a dual antiviral activity: firstly, N-acetylcysteine is converted to cysteine by  
485 HDAC2 and by that means, it is competitively inhibiting the native function of HDAC2 and  
486 interactions with viral proteins (Figure 7C, Table S8). Cysteine next fuels the glutathione  
487 biosynthesis pathway and produces glutathione in two steps.

488  
489 Given the high coverage of validated molecules with activity against SARS-CoV-2 that  
490 NICEdrug.ch captured in this unbiased and reactive site-centric analysis, we suggest there  
491 might be other molecules in the set of 1,300 NICEdrug.ch candidates that could also fight  
492 COVID-19. Excitingly, there are many molecules that can be directly tested since these are  
493 drugs that have already passed all safety regulations or are molecules in food, like N-  
494 acetylcysteine for which we further reveal an action mechanism behind its potential anti  
495 SARS-CoV-2 activity. Other new candidates for which no safety data is available should be  
496 further validated experimentally and clinically. The mechanistic analyses provided by  
497 NICEdrug.ch could also guide new pharmacokinetic and pharmacodynamic models simulating  
498 SARS-CoV-2 infection and treatment.

## 500 Discussion

501 To systematically illuminate the metabolism and all enzymatic targets (competitively  
502 inhibited) of known drugs and hypothetical prodrugs to aid in the development of new  
503 therapeutic compounds, we used a proven reaction-prediction tool BNICE.ch (Hatzimanikatis  
504 et al., 2005) and an analysis of neighboring atoms of reactive sites analogous to BridgIT  
505 (Hadadi et al., 2019) and performed the first large-scale computational analysis of drug  
506 biochemistry and toxicity in the context of human metabolism. The analysis involved over  
507 250,000 small molecules, and curation and computation of bio- and physicochemical drug  
508 properties that we assembled in an open-source drug database NICEdrug.ch that can  
509 generate detailed drug metabolic reports and can be easily accessed and used by researchers,  
510 clinicians, and industry partners. Excitingly, NICEdrug.ch revealed 20 million potential  
511 reactive sites at the 250,000 small molecules of the database, and there exist over 3,000



512 enzymes in the human metabolism that can be inhibited with the 250,000 molecules. This is  
513 because NICEdrug.ch can identify *all* potential metabolic intermediates of a drug and scans  
514 these molecules for substructures that can interact with catalytic sites across all enzymes in  
515 a desired cell.

516

517 NICEdrug.ch adapts the metric previously developed for reactions in BridgIT (Hadadi et al.,  
518 2019) to precisely compare drug-drug and drug-metabolite pairs based on similarity of  
519 reactive site and the neighborhood around this reactive site, which we have recently shown  
520 outperforms previously defined molecular comparison metrics (Hadadi et al., 2019). Since  
521 NICEdrug.ch shows high specificity in the identification of such reactive sites and  
522 neighborhood, it provides a better mechanistic understanding than currently available  
523 methods (Robertson, 2005). Despite these advances, it remains challenging to systematically  
524 identify non-competitive inhibition or targeting of non-enzymatic biological processes. We  
525 suggest coupling NICEdrug.ch drug metabolic reports with other *in silico* and experimental  
526 analyses accounting for signaling induction of small molecules and other non-enzymatic  
527 biological processes like transport of metabolites in a cell. The combined analysis of drug  
528 effects on different possible biological targets (not uniquely enzymes) will ultimately increase  
529 the coverage of molecules for which a mechanistic understanding of their mode of action is  
530 assigned.

531

532 A better understanding of the mechanisms of interactions and the specific nodes where the  
533 compounds act can help re-evaluate pharmacokinetic and pharmacodynamic models,  
534 dosage, and treatment. Such understanding can be used in the future to build models that  
535 correlate the pharmacodynamic information with specific compounds and chemical  
536 substructures in a manner similar to the one used for correlating compound structures with  
537 transcriptomic responses. We have shown for one of the most commonly used anticancer  
538 drugs, 5-FU, that NICEdrug.ch identifies and ranks alternative sources of toxicity and hence  
539 can guide the design of updated models and treatments to alleviate the drug's side-effects.

540

541 The mechanistic understanding will also further promote the development of drugs for  
542 repurposing. While current efforts in repurposing capitalize on the accepted status of known  
543 drugs, some of the issues with side effects and unknown interactions limit their development

544 as drugs for new diseases. Given that drug repurposing will require new dosage and  
545 administration protocols, the understanding of their interactions with the human metabolism  
546 will be very important in identifying, developing, and interpreting unanticipated side effects  
547 and physiological responses. We evaluated the possibility of drug repurposing with  
548 NICEdrug.ch as a substitute for statins, which are broadly used to reduce cholesterol but have  
549 many side effects. NICEdrug.ch and its reactive site-centric comparison accurately cluster  
550 both family types of statins, even though they are similar in overall molecular structure and  
551 show different reactivity. In addition, NICEdrug.ch suggests a set of new molecules with  
552 hypothetically less side effects (Endo and Hasumi, 1993; Tanaka et al., 2004) that share  
553 reactive sites with statins.

554

555 A better mechanistic understanding of drug targets can guide the design of treatments  
556 against infectious diseases, for which we need effective drugs that target pathogens without  
557 side effects in the host cell. This is arguably the most challenging type of problem in drug  
558 design, and indeed machine learning has continuously failed to guide such designs given the  
559 difficulty in quantifying side effects—not to mention in acquiring large, consistent, and high-  
560 quality data sets from human patients. To demonstrate the power of NICEdrug.ch for tackling  
561 this problem, we sought to identify drugs that target liver-stage malaria parasites and  
562 minimize the impact on the human host cell. We identified over 500 drugs that inhibit  
563 essential *Plasmodium* enzymes in the liver stages and minimize the impact on the human host  
564 cell. Our top drug candidate is shikimate 3-phosphate targeting the parasite's shikimate  
565 metabolism, which we recently identified as essential in a high-throughput gene knockout  
566 screening in *Plasmodium* (Stanway et al., 2019). Excitingly, our suggested antimalarial  
567 candidate shikimate 3-phosphate has already been used for *Escherichia* and *Streptococcus*  
568 infections without appreciable side effects (Díaz-Quiroz et al., 2018).

569 Finally, minimizing side effects becomes especially challenging in the treatment of viral  
570 infections, since viruses fully rely on the host cell to replicate. As a last demonstration of the  
571 potential of NICEdrug.ch, we sought to target COVID-19 by identifying inhibitors of 22 known  
572 enzymatic host factors of SARS-CoV-2 (Gordon et al., 2020). NICEdrug.ch identified over 1,300  
573 molecules that might target the 22 host factors and prevent SARS-CoV-2 replication. As a  
574 validation, NICEdrug.ch correctly identified known inhibitors of those enzymes, and further  
575 suggested safe drugs for repurposing and other food molecules with activity against SARS-

576 CoV-2. Among the NICEdrug.ch suggestions for COVID-19, based on the knowledge on its  
577 mechanism and safety, we highlight N-acetylcysteine as an inhibitor of HDAC2 and SARS-CoV-  
578 2.

579

580 Overall, we believe that a systems level or metabolic network analysis coupled with an  
581 investigation of reactive sites will likely accelerate the discovery of new drugs and provide  
582 additional understanding regarding metabolic fate, action mechanisms, and side effects and  
583 can complement on-going experimental effects to understand drug metabolism (Javdan et  
584 al., 2020). We suggest the generation of drug metabolic reports to understand the reactivity  
585 of new small molecules, the possibility of drug repurposing, and the druggability of enzymes.  
586 Our results using NICEdrug.ch suggest that this database can be a novel avenue towards the  
587 systematic pre-screening and identification of drugs and antimicrobials. In addition to human  
588 metabolic information, NICEdrug.ch currently includes information for the metabolism of *P.*  
589 *berghei* and *E. coli*. Because we are making it publicly available ([https://icsb-  
590 databases.epfl.ch/pathways/Nicedrug/](https://icsb-databases.epfl.ch/pathways/Nicedrug/)), our hope is that scientists and medical practitioners  
591 alike can make use of this unique database to better inform their research and clinical  
592 decisions—saving time, money, and ultimately lives.

593

## 594 **Acknowledgements**

595 We would like to thank Dr. Ljubisa Miskovic, Dr. Volker T. Heussler, Dr. Reto Caldelari, Dr. Jens  
596 Nielsen, and Dr. Adil Mardinoglu for critical feedback and discussions. The graphical abstract  
597 and Figures 6, 7, S5, and S6 were done with BioRender. H.M. was funded by the European  
598 Union’s Horizon 2020 research and innovation program under the Marie Skłodowska-Curie  
599 grant agreement No 72228. H.M., K.H. and J.H. were supported by the Ecole Polytechnique  
600 Fédérale de Lausanne (EPFL). A.C. and V.H. were funded by grant 2013/155 (MalarX), N.H.  
601 and J.H. were funded by grant 2013/158 (MicroScapesX); both are SystemsX.ch grants  
602 awarded by the SNSF.

603

## 604 **Author Contributions**

605 Conceptualization, V.H., H.M., N.H., A.C-P.; Methodology, V.H., H.M., K.H., N.H., A.C-P.;  
606 Software, H.M., K.H., J.H.; Formal analysis, H.M., K.H.; Investigation, H.M., K.H., A.C-P.;  
607 Writing- Original Draft, H.M., A.C-P.; Writing- Review & Editing, V.H., H.M., A.C-P., J.H., N.H.;

608 Visualization, H.M., A.C-P.; Supervision, V.H.; Project Administration, V.H., H.M.; Funding  
609 Acquisition, V.H.

610

#### 611 **Declaration of interests**

612 The authors declare no competing interests.

613

#### 614 **Main figure title and legends**

##### 615 **Figure 1. Pipeline to construct and use the NICEdrug.ch database.**

616 NICEdrug.ch (1) curates available information and calculates the properties of an input  
617 compound; (2) identifies the reactive sites of that compound; (3) explores the hypothetical  
618 metabolism of the compound in a cell; (4) stores all functional, reactive, bio-, and physico-  
619 chemical properties in open-source database; and (5) allows generation of reports to evaluate  
620 (5a) reactivity of a small molecule, (5b) drug repurposing, and (5c) druggability of an  
621 enzymatic target. See also Figure S1, Figure S2, Figure S3, and Table S1.

622

##### 623 **Figure 2. Similarity in reactive site and neighborhood defines para-metabolites in 5-FU 624 metabolism and inhibited human metabolic enzymes.**

625 Eight para-metabolites in the 5-FU metabolic neighborhood (represented as defined in  
626 Materials and Methods). We show the most similar native human metabolites, inhibited  
627 enzymes, and native products of the reactions. See also Table S2.

628

##### 629 **Figure 3. A different reactive site but similar neighborhood defines top anti-metabolites in 630 5-FU metabolism and inhibited human metabolic enzyme.**

631 Eight anti-metabolites of dUMP in the 5-FU metabolic neighborhood (represented as defined  
632 in Materials and Methods). Note that the reactive site of the anti-metabolites is different than  
633 the one of the native human metabolite, but the neighborhood is highly similar, which  
634 determines the high NICEdrug score (value in parenthesis). We show the inhibited human  
635 enzyme (dTMP synthase) and reaction, and its native product. See also Table S2.

636

##### 637 **Figure 4. Comparing downstream products to known toxic molecules and analyzing their 638 common structural toxic alerts explains metabolic toxicity of 5-FU.**

639 Example of six suggested toxic molecules in the 5-FU metabolic neighborhood (represented  
640 as defined in Materials and Methods). We show toxic compounds from the supertoxic and  
641 hepatotoxic databases that lead to the highest NICEdrug toxicity score (number under toxic  
642 intermediate name, Materials and Methods). We highlight functional groups linked to five  
643 NICEdrug toxic alerts (legend bottom right). See also Table S2.

644

645 **Figure 5. Clustering of molecules with statin reactive sites based on NICEdrug score suggests**  
646 **drugs for repurposing.**

647 **(A)** Pairwise NICEdrug score between all molecules with statin reactive sites (heat map) and  
648 number of metabolic reactions in which they participate (right). We highlight clusters of  
649 statins of type 1 (cluster a) and type 2 (cluster b), and clusters of most similar molecules to  
650 type 1 statins (cluster c) and type 2 statins (cluster d). Within the metabolic reactions, we  
651 indicate the total number of reactions (dark color) and the number of reactions that involve  
652 the statin reactive site (light color). **(B)** Examples of statins and Mevastatin analogues of type  
653 1 from cluster c (blue) and of type 2 from cluster d (gold). We left the known statins  
654 unmarked, which are appropriately clustered together based on the NICEdrug score, and we  
655 mark with \* new molecules that cluster with statins and that NICEdrug.ch suggests could be  
656 repurposed to act as statins. Reactive sites in type 1 statins and type 2 statins are colored in  
657 blue and orange, respectively. The reactive site neighborhood as considered in the NICEdrug  
658 score is also marked. See also Figure S3, Figure S4, Table S3, and Table S4.

659

660 **Figure 6. NICEdrug.ch suggests shikimate 3-phosphate as a top candidate to target liver-**  
661 **stage malaria and minimize side effects in host human cells.**

662 **(A)** Schema of ideal scenario to target malaria, wherein a drug efficiently inhibits an essential  
663 enzyme for malaria parasite survival and does not inhibit essential enzymes in the host human  
664 cell to prevent side effects. **(B)** Shikimate 3-phosphate inhibits enzymes in the *Plasmodium*  
665 shikimate metabolism, which is essential for liver-stage development of the parasite.  
666 Shikimate 3-phosphate does not inhibit any enzyme in the human host cell since it is not a  
667 native human metabolite, and it does not show similarity to any native human metabolite.  
668 **(C)** Mechanistic details of inhibition of aroC by shikimate 3-phosphate and other NICEdrug  
669 candidates. See also Table S5 and Table S6.

670

671 **Figure 7. NICEdrug strategy to fight COVID-19, and NICEdrug candidate inhibitors of SARS-**  
672 **CoV-2 host factors: reverse transcriptase and HDAC2.**

673 **(A)** Schema of NICEdrug strategy to target COVID-19, wherein a drug (top-left) or molecules  
674 in food (top-right) efficiently inhibit a human enzyme hijacked by SARS-CoV-2. Inhibition of  
675 this host factor reduces or abolishes protein-protein interactions (PPI) with a viral protein and  
676 prevents SARS-CoV-2 proliferation. **(B)** Inhibition of the reverse transcriptase (E.C: 1.1.1.205  
677 or P12268) and the PPI with SARS-CoV-nsp14 by didanosine based on NICEdrug.ch. **(C)**  
678 Inhibition of the HDAC2 (E.C: 3.5.1.98) and the PPI with SARS-CoV-nsp5 by molecules  
679 containing acetyl moiety (like melatonin, N-acetylcysteine, and N8-acetylspermidine), and  
680 molecules containing carboxylate moiety (like valproate, stains, and butyrate) based on  
681 NICEdrug.ch. See also Figure S5, Figure S6, Table S7, and Table S8.

682  
683 **Supplementary figure title and legends**

684 **Supplementary figure 1. Overview of number of molecules in NICEdrug.ch and their**  
685 **structural curation, related to Figure 1.**

686 **(A)** Venn diagram showing the number of compounds in NICEdrug.ch and their source  
687 database: KEGG, DrugBank, ChEMBLE NTD, and ChEMBLE. **(B)** Representation on how  
688 different kekulé forms affect the identification of reactive sites and prediction of biological  
689 activity for an example molecule.

690  
691 **Supplementary figure 2. Distribution of reactive sites and metabolic reactions as of E.C.**  
692 **numbers linked to all molecules in NICEdrug.ch, related to Figure 1.**

693 **(A)** Distribution of reactive sites identified in all molecules of NICEdrug.ch among classes of  
694 E.C. numbers. **(B)** Specificity of reactive sites identified in drugs based on length and types of  
695 participating atoms. **(C)** Distribution of drug metabolic reactions based on class of E.C.  
696 number. **(D)** Distribution of Gibbs free energy for the drug metabolic reactions, which are the  
697 reactions linked to all molecules of NICEdrug.ch.

698  
699 **Supplementary figure 3. Description of NICEdrug score, related to Figures 1, 2, 3, 4, 5, and**  
700 **6.**

701 Example of NICEdrug score calculation. The NICEdrug score takes into account the structure  
702 of a molecule's reactive site and its seven-atom-away neighborhood for similarity evaluation,  
703 analogous to BridgIT.

704

705 **Supplementary figure 4. Clustering based on NICEdrug score, molecular weight, and**  
706 **reactivity of statin like molecules, related to Figure 5.**

707 Hierarchical clustering based on the NICEdrug score of all molecules in NICEdrug.ch that  
708 contain statin reactive site (left). We report the molecules' molecular weight (middle left) and  
709 number of drug metabolic reactions or reactions in which these drugs participate (middle).  
710 The molecular weight seems to be inversely correlated with the number of drug metabolic  
711 reactions. We highlight six clusters of drugs (a-f, middle right) and an example representative  
712 molecule (left). Interestingly, these clusters also group molecules based on bio- or physico-  
713 chemical properties: "cluster a" involves a range of silicon-containing chemical molecules,  
714 "cluster b" are drug like molecules of type 2 statins, "cluster c" includes chemical molecules  
715 with a long chain connected to the reactive site, "cluster d" involves molecules with 1-  
716 indanone fused with a tetrahydropyran ring, "cluster e" comprises drug-like molecules of type  
717 1 statins, and "cluster f" are 16-membered ring macrolide antibiotics.

718

719 **Supplementary figure 5. NICEdrug candidate inhibitors of SARS-CoV-2 host factors:**  
720 **galactosidase, catechol methyltransferase, and DNA polymerase, related to Figure 7.**

721 **(A)** Inhibition of the galactosidase (E.C: 3.2.1.22 or P06280) and the PPI with SARS-CoV-2  
722 nsp14 by actodigin based on NICEdrug.ch. **(B)** Inhibition of the catechol methyltransferase  
723 (E.C: 2.1.1.6 or P21964) and the PPI with SARS-CoV-2 nsp7 by 6-paradol, 10-gingerol, and 6-  
724 shogaol, which are molecules in ginger, based on NICEdrug.ch. **(C)** Inhibition of the DNA  
725 polymerase (E.C: 2.4.1.-) and the PPI with SARS-CoV-2 nsp8 by brivudine based on  
726 NICEdrug.ch.

727

728 **Supplementary figure 6. NICEdrug candidate inhibitors of ACE2, related to Figure 7.**

729 Inhibition of the ACE2 (E.C: 3.4.17.23), a putative host factor of SARS-CoV-2, by the known  
730 inhibitor captopril, and NICEdrug candidates D-leucyl-N-(4-carbamimidoylbezy)-L-  
731 prolinamide and indole-3-acetyl-proline.

732

## 733 **Materials and Methods**

### 734 **Representation of metabolic neighborhood in figures of this manuscript**

735 We represent the metabolic neighborhood of a drug with reactions or steps away (arrows),  
736 where each step away (circle connected to arrow) involves a set of compounds. We extract  
737 compounds at each step that present a high NICEdrug score (value under metabolite name)  
738 with the native substrate of a reaction in the human cell. Reactive sites common to neighbor  
739 metabolites and native human metabolites are shaded with colors matching the color of the  
740 enzymes (packmen) that are inhibited. The neighborhood (seven atoms away, as considered  
741 in NICEdrug score) of the reactive sites is circled in the metabolites and native human  
742 metabolites with the same color as the reactive sites and enzymes. Compounds marked with  
743 \* are confirmed inhibitors and references are provided in the main text.

744

### 745 **Representation of enzymatic inhibition in figures of this manuscript**

746 We represent the enzymes and catalyzed reactions inhibited by NICEdrug candidates.  
747 Highlighted are the reactive site and neighborhood (as considered in the NICEdrug score) in  
748 candidate drugs and metabolites, which are native substrates of the human enzymes. The  
749 SARS-CoV-2 proteins interaction with the enzyme is presumed to be diminished or abolished  
750 upon inhibition of the human enzyme. Compounds marked with \* are confirmed inhibitors  
751 and references are provided in the main text.

752

### 753 **Curation of input molecules used in the construction of NICEdrug.ch**

754 We constructed the NICEdrug.ch database to gather small molecules suitable for treatment  
755 of human diseases. We collected the SMILES structure, synonyms, and any available bio- and  
756 physico-chemical property included from three source databases: KEGG, ChEMBL, and  
757 DrugBank, which added up to 70,976 molecules by January 2018 (Figure S1A). Only molecules  
758 that were fully structured were imported to our database. We further curated the imported  
759 molecules by removing duplicate structures and merging annotations from different  
760 databases into one molecule entry in the database. For removing duplicate structures we  
761 used canonical SMILES (Weininger, 1988) generated by openbabel (O'Boyle et al., 2011)  
762 version 2.4.0. This unification method is based on atoms and their connectivity in a molecule  
763 in terms of a molecular graph that is captured by the canonical SMILES. Therefore, different  
764 resonance forms, stereoisomers, as well as dissociated and charged states of the same



765 compound are mapped to one entry in database. Furthermore, we filtered molecules based  
766 on Lipinski rules (Lipinski et al., 2001): (1) the molecular weight should be less than 500  
767 Dalton, (2) the number of hydrogen bond donors should be less than five, (3) the number of  
768 hydrogen bond acceptors should be less than ten, and (4) an octanol-water partition  
769 coefficient (log P) should be less than five. According to Lipinski rules an active orally drug  
770 does not violate more than one of the above criteria. We calculated criteria one, two and  
771 three based on the structural information from SMILES of molecules. To assess criterion four,  
772 we relied on reported data in the source database. We kept in the NICEdrug.ch database  
773 those compounds for which the partition coefficient was not available.

774 We performed a separate analysis to account for non-unique graph representations of  
775 aromatic rings, also called *kekulé structures*. The existence of aromatic rings and the fact that  
776 bond-electrons are shared within the ring make several single-double bond assignments  
777 possible, which results in multiple *kekulé* representations for a single molecule (Figure S1B).  
778 We included all such *kekulé* structures to account for alternative atom-bond connectivity and  
779 associated reactivity. We call “effective forms” to the *kekulé* representations that show  
780 different reactive sites than their canonical structures. For example, there can be two  
781 effective forms plus the canonical structure (Figure S1B). In total, we found 42,092 effective  
782 forms for 29,994 aromatic compounds in NICEdrug.ch database and we kept them for further  
783 analysis.

784 We also computed the thermodynamic properties of all drugs in NICEdrug.ch. Specifically,  
785 we computed the Gibbs free energy of formation ( $\Delta_f G^\circ$ ) using the group contribution method  
786 of Mavrovouniotis (Jankowski et al., 2008).

787 The NICEdrug.ch database includes a total number of 48,544 unique and curated small  
788 molecules (Figure S1A).

### 790 **Identification of reactive sites in drugs**

791 The 3D structures of enzyme pockets are complex and mostly unknown. Therefore, evaluating  
792 and comparing docking of two small molecules in the pocket of a specific target is impossible  
793 most of the times. Using BNICE.ch, we focused on the complementary structure of active sites  
794 on substrates, also called *reactive site*. To recognize the potential reactive sites on molecules,  
795 we scanned molecules using expert-curated generalized reaction rules of BNCIE.ch (Hadadi et  
796 al., 2016), which mimic the identification of substrates by the enzyme pocket and account for

797 the promiscuous activity of enzymes. These reaction rules incorporate the information of  
798 biochemical reactions and have third-level Enzyme Commission (EC) identifiers. Each  
799 BNICE.ch reaction rule accounts for three levels of information: (1) atoms in reactive sites of  
800 compounds, (2) connectivity and configuration of atom bonds in the reactive site, and (3)  
801 mechanism of bond breakage and formation during the reaction. As of May 2020, BNICE.ch  
802 contains 450 bidirectional generalized reaction rules that can reconstruct 8118 KEGG  
803 reactions (Hadadi et al., 2016). Here, we include all BNICE.ch rules to identify all possible  
804 reactive sites on a given drug in two steps. First, a BNICE.ch rule identifies all atoms in a  
805 compound that belong to the rule's reactive site. Second, the rule evaluates the connectivity  
806 of the atoms previously identified. The candidate compounds for which a BNICE.ch rule  
807 identified a reactive site were validated as metabolically reactive and considered for analysis  
808 in NICEdrug.ch.

809 It is important to note that thanks to the generalized reaction rules, which abstract the  
810 knowledge of thousands of biochemical reactions, BNICE.ch is able to reconstruct known  
811 biotransformations and also propose novel metabolic reactions. This was demonstrated in  
812 the reconstruction of the ATLAS of Biochemistry (Hadadi et al., 2016), which involves up to  
813 130,000 reactions between known compounds.

814

### 815 **Analysis of drug metabolism in human cells.**

816 To mimic biochemistry of human cells and simulate human drug metabolism, we collected all  
817 available information (metabolites and metabolic activities or EC numbers of enzymes) on  
818 human metabolism from three available databases: the human metabolic models Recon3D  
819 (Brunk et al., 2018) and HMR (Pornputtapong et al., 2015), and the Reactome database (Croft  
820 et al., 2011). These three databases include a total of 2,266 unique human metabolites and  
821 2,066 unique EC numbers of enzymes (Table S1).

822 To explore the biochemical space beyond the known human metabolic reactions and  
823 compounds, we used (1) the generalized enzymatic reaction rules of BNICE.ch that match up  
824 to the third EC level the collected human enzymes, and (2) all of the collected human  
825 metabolome. We evaluated the reactivity of each drug in a human cell using the retro-  
826 biosynthesis algorithm of BNICE.ch, which predicts hypothetical biochemical transformations  
827 or *metabolic neighborhood* around the drug of study. We generated with BNICE.ch metabolic  
828 reactions in which each drug and all known human metabolites could participate as substrate

829 or products. We also allowed a set of 53 known cofactors to react with the human  
830 metabolites (Table S1).

831 We define the boundaries of the metabolic neighborhood of a molecule with a maximum  
832 number of reactions or *steps away* that separate the input molecule (drug of study) from the  
833 furthest compound. In BNICE.ch, a generation  $n$  of compounds involves all metabolites that  
834 appear for the first time in the metabolic neighborhood of a drug after  $n$  reactions or steps  
835 happened. For example, in the case study of 5-FU we find the compound 5-Fluorouridine in  
836 generation 2 or 2 steps away, which means there are two metabolic reactions that separate  
837 5-FU and 5-Fluorouridine (Figure 2).

838 In NICEdrug.ch, there exist 197,246 compounds in generation 1 (1 step away) from all input  
839 drugs. The 197,246 compounds are part of the potential drug metabolic neighborhood in  
840 human cells. Out of all generation 1 molecules, 13,408 metabolites can be found in human  
841 metabolic models and HMDB database (Wishart et al., 2018), 16,563 metabolites exist in  
842 other biological databases, and the remaining 167,245 metabolites are catalogued as known  
843 compounds in chemical databases (i.e., PubChem). Note that HMDB includes native human  
844 metabolites and non-native human compounds, like food ingredients.

845 The 197,246 products that are one-step away of all NICEdrug.ch molecules are part of a  
846 hypothetical biochemical neighborhood of 630,449 drug metabolic reactions. Of all drug  
847 metabolic reactions, 5,306 reactions are cataloged in biological databases, and the remaining  
848 625,143 reactions are novel. A majority of the reactions involved oxidoreductases (42.54%),  
849 broken down into 27.45% of lyases, 7.15% of hydrolases, 6.28% of transferases, 1% of  
850 isomerases, and 15.58% of ligases. Interestingly based on the previously identified reactive  
851 sites, out of the 265,935 (42.54% of 625,143) oxidoreductase reactions, 49.92% are catalyzed  
852 by the p450 family of enzymes, which are known to be responsible for the metabolism of drug  
853 (Figure S2C).

854

### 855 **Using NICEdrug.ch database for analysis of the metabolic neighborhood of a drug**

856 In NICEdrug.ch webserver, users can look up for a drug using the drugs' name and other  
857 identifiers like ChEMBL, DrugBank and KEGG. NICEdrug.ch will report a unique identifier for  
858 the compound that will be input for upcoming analysis modules. The *predict metabolism*  
859 module allows to study the metabolic network around an input molecule. The input to this  
860 module is: (1) the unique identifier of the drug of interest, (2) a maximum number of reactions

861 or *steps away* that shall separate the input drug to the furthest compound in the metabolic  
862 neighborhood.

863 The output of this analysis is a report in the form of a csv file that includes all compounds and  
864 metabolic reactions in the metabolic neighborhood of the input drug. One can also export the  
865 neighborhood in the form of a visual graph, in which nodes are molecules and edges are  
866 reactions.

867

### 868 **Definition of the NICEdrug score**

869 Based on the theory of lock and key, two metabolites that can be catalyzed by the same  
870 enzyme may have similar reactive sites and also neighboring atoms. In order to quantify the  
871 similarity inside and around reactive sites of two molecules, we developed a metric called  
872 *NICEdrug score* (Figure S3), which is inspired on BridgIT (Hadadi et al., 2019). BridgIT assesses  
873 the similarity of two reactions, considering the reactive site of the participating substrates  
874 and their surrounding structure until the seventh atom out of the reactive site.

875 The NICEdrug score is an average of two similarity evaluations: (1) the atom-bond  
876 configuration inside reactive site ( $\alpha$  parameter), and (2) the 7 atom-bond chain molecular  
877 structure around the reactive site ( $\beta$  parameter). The NICEdrug score, and its parameters  $\alpha$   
878 and  $\beta$ , range between 0 and 1 when they indicate no similarity and identical structure,  
879 respectively. Different constraints on the  $\alpha$  and  $\beta$  parameters determine the identification of  
880 different types of inhibition like para-metabolites and anti-metabolites (see other sections in  
881 this Materials and Methods).

882 We show the evaluation of NICEdrug scores for three example compounds (Figure S3). In this  
883 example, Digoxin, Labriformidin and Lanatoside C all share the reactive site corresponding to  
884 EC number 5.3.3.- ( $\alpha=1$ ). Starting from the atoms of the identified reactive site, eight  
885 description layers of the molecule were formed, where each layer contains a set of connected  
886 atom-bond chains. Layer zero includes types of atoms of reactive site and their count. Layer  
887 1 expands one bond away from all of the atoms of reactive site and accounts for atom-bond-  
888 atom connections. This procedure is continued until layer 7, which includes the sequence of  
889 8 atoms connected by 7 bonds. Then, we compare the fingerprint of each molecule to the  
890 other participants of the class based on the Tanimoto similarity scores. A Tanimoto score near  
891 0 designates no or low similarity, whereas a score near 1 designates high similarity in and

892 around reactive site. Lanatoside C and Digoxin share the same substructure till 8 layers out of  
893 reactive site which is presented in the NICEdrug score by preserving score 1 in all layers, so  
894 the overall Tanimoto score for these two compounds in the context of EC number 5.3.3.- is 1  
895 ( $\alpha=1$  and  $\beta=1$ ). However, the structure of two compounds are not exactly the same and  
896 actually Lanatoside C has 8 more carbon atoms and 6 more oxygen atoms, shaped as an extra  
897 benzenehexol ring and an ester group. Although this part is far from the reactive site, based  
898 on the NICEdrug score they both can perfectly fit inside the binding pocket of a common  
899 protein related to this reactive site. This hypothesis is proved by experiments reported in  
900 KEGG and DrugBank. According to DrugBank and KEGG, Lanatoside C has actions similar to  
901 Dioxin and both of them have the same target pathways: Cardiac muscle contraction and  
902 Adrenergic signaling in cardiomyocytes. Furthermore, target protein for both of them is  
903 ATP1A.

904 Also, the NICEdrug score effectively captures and quantifies differences around the reactive  
905 site. The substructure around the reactive site in Labriformidin is slightly different ( $\alpha=1$  and  
906  $\beta < 1$ ). The difference is calculated through different layers of the NICEdrug score.

907 In the case study of 5-FU, in order to predict competitive inhibition, we analyzed all the  
908 metabolites that share reactive site with 5-FU or its downstream products ( $\alpha=1$ ) and then we  
909 ranked the most similar metabolites based on their similarity in neighborhood of reactive site  
910 to 5-FU or its downstream products ( $\beta$ ). To assess the structural differences in the reactive  
911 sites themselves ( $\alpha$ ), we implemented the Levenshtein edit distance algorithm (Levenshtein,  
912 1966) to determine how many deletions, insertions, or substitutions of atom/bonds are  
913 required to transform one pattern of reactive site into the other one. Here, the edit distance  
914 explains the difference between the reactive sites of the intermediate and the human  
915 metabolite. However, even slight changes in the reactive site affect its interaction with the  
916 binding site. To ensure that the divergence retained the appropriate topology, we compared  
917 the required edit on reactive site with interchangeable groups, termed bioisosteric groups  
918 (Papadatos and Brown, 2013). These bioisosteric groups contain similar physical or chemical  
919 properties to the original group and largely maintain the biological activity of the original  
920 molecule. An example of this is the replacement of a hydrogen atom with fluorine, which is a  
921 similar size that does not affect the overall topology of the molecule. For this analysis, we

922 used 12 bioisosteric groups adapted from the study by Papadatos et.al. (Papadatos and  
923 Brown, 2013).

924 To predict irreversible Inhibitors in metabolism of 5-FU, we kept only molecules with a  
925 similarity score greater than 0.9 to metabolites ( $\beta > 0.9$ ), to preserve a high similarity in the  
926 neighborhood of the reactive sites. Then, we checked which ones contained reactive sites  
927 that differed only in the replacement of bioisosteric groups ( $\alpha \sim 1$ ).

928

### 929 **Classification of drugs based on the NICEdrug score**

930 Classification of compounds with similar structure is normally used to assign unknown  
931 properties to new compounds. For instance, one can infer ligand-protein binding for a drug  
932 when its action mechanism or the structure of the target proteins are not known. In this study,  
933 we have demonstrated four strategies to classify drugs (Figure 1), which are from less to more  
934 stringent: classifying (1) molecules that participate in reactions with the same EC up to the 3<sup>th</sup>  
935 level, (2) molecules that in addition share a BNICE.ch reaction rule, (3) molecules that in  
936 addition to both previous points share reactive site, (4) molecules that show high similarity of  
937 reactive site and neighborhood based on the NICEdrug score.

938 The EC number guarantees that molecules are catalyzed with similar overall reaction  
939 mechanism. Generalized reaction rules from BNICE.ch further capture different  
940 submechanisms inside an EC number (Hadadi et al., 2016). A BNICE.ch reaction rule might  
941 involve more than one reactive site. Hence, information of reactive sites provide further  
942 insights into the molecule's reactivity. Furthermore, similarity of reactive sites and their  
943 neighborhoods based on the NICEdrug score increase the comparison resolution and this is  
944 the basis of the classification in NICEdrug.ch.

945 In NICEdrug.ch database there exist 95,342 classes that comprise all drugs and human  
946 compounds sharing EC, BNICE.ch rule, and reactive site (classification based on our strategy  
947 3). We computed the NICEdrug score between all pairs of molecules in a class and this  
948 information is available in NICEdrug.ch.

949

### 950 **Identification of drugs acting as para-metabolites based on NICEdrug score**

951 Small molecules that share reactive site and are structurally similar to native human  
952 metabolites enter and bind the pocket of native enzymes and competitively inhibiting

953 catalysis acting as para-metabolites (Ariens, 2012). In this study, we define as para-metabolite  
954 any drug or any of its metabolic neighbors that (1) shares reactive site with native metabolites  
955 ( $\alpha=1$ ), and (2) preserves a high NICEdrug score with respect to the reactive site neighborhood  
956 ( $\beta>0.9$ ).

957

#### 958 **Identification of drugs acting as anti-metabolites based on NICEdrug score**

959 Small molecules that do not share reactive site but are structurally similar to native human  
960 metabolites might enter the binding pocket of native enzymes and inhibiting catalysis acting  
961 as anti-metabolites (Ariens, 2012). In this study, we define as anti-metabolite any drug or any  
962 of its metabolic neighbors that (1) differs slightly in reactive site from a native metabolite  
963 ( $\alpha\sim 1$ ), and (2) preserves high similarity in the reactive site neighborhood ( $\beta>0.9$ ). We  
964 hypothesize that a low divergence in the reactive site, still allows a non-native compound to  
965 enter and bind the enzyme pocket since it is structurally similar enough to the native  
966 substrate.

967

#### 968 **Identification of NICEdrug toxic alerts**

969 We obtained all NICEdrug toxic alters from ToxAlert database (Sushko et al., 2012). ToxAlert  
970 database includes about 1,200 structural toxic alerts associated with particular types of  
971 toxicity. Toxic alerts are provided in the form of SMART patterns that are searchable in SMILES  
972 structure of molecules. NICEdrug.ch uses openbable tool (O'Boyle et al., 2011) to search for  
973 these structural alerts on SMILES of compounds.

974

#### 975 **Collection of reference toxic molecules in NICEdrug.ch**

976 Studying the adverse effects of chemicals on biological systems has led to development of  
977 databases cataloging toxic molecules. The Liver Toxicity Knowledge Base (LTKB) integrates  
978 1,036 molecules annotated with human Drug-induced liver injury risk (severity). Super toxic  
979 DB include about 60k toxic molecules, that are annotated with their toxicity estimate,  
980  $LC_{50}/LD_{50}$  i.e., lethal dose or concentration at which 50% of a population dies.

981 As a resource of approved toxic molecules, we collected all of the molecules cataloged as  
982 toxic in LTKB and super toxic databases. We used this collection as a reference to compare  
983 the similarity of drugs or and products of drug metabolism with approved toxic molecules.

984

### 985 **Definition of a toxicity score in NICEdrug.ch**

986 The number of molecules labeled as toxic in databases is disproportionately low compared to  
987 the space of compounds. On the other hand, toxic alerts are defined for a big number of  
988 compounds and are linked to redundant molecular structures.

989 We measured the similarity of drugs and their metabolic neighbors with the collection of  
990 reference toxic molecules using the NICEdrug score. We assigned toxic alerts to molecules in  
991 NICEdrug.ch if a molecule and toxic molecule shared a molecular substructure linked to the  
992 toxic alert.

993 Finally, NICEdrug.ch provides a toxicity report in the form of a csv file for each molecule in the  
994 metabolic neighborhood including six values linked to the most similar toxic molecules in both  
995 toxic reference databases (LTKB and supertoxic databases): (1) the NICEdrug score between  
996 the drug and those most similar toxic molecules, (2) the severity degree of the hepatotoxic  
997 compound, and  $\log(\text{LC}_{50})$  of the supertoxic compound, and (3) the number of common toxic  
998 alerts between the drug and the most similar toxic molecules. The list of toxic alerts is also  
999 provided.

1000 We combined the six values of the toxicity report into a toxicity score defined as follows:

1001

$$1002 \sum_i \text{NICEdrug score} \times (\log(\text{LC}_{50}) \text{ or severity degree})$$

1003  $\times$  number of common NICEdrug toxic alerts

1004  $i \in \{\text{the most similar approved toxic molecules in LTKB and supertoxic databases}\}$

1005

1006 The toxicity score in NICEdrug.ch served to quantify the toxicity of each molecule in the  
1007 metabolic neighborhood of a drug, recapitulate known toxic molecules, and suggest new toxic  
1008 compounds (Figure 4).

1009

1010

### 1011 **Analysis of essential enzymes and linked metabolites in *Plasmodium* and human cells**

1012 We extracted information of essential genes and enzymes for liver-stage malaria  
1013 development from our recent study (Stanway et al., 2019). In this study, we developed the  
1014 genome-scale metabolic model of *Plasmodium berghei*, which shows high consistency



1015 (approximately 80%) with the largest gene knockout datasets in *Plasmodium* blood (Bushell  
1016 et al., 2017) and liver stages (Stanway et al., 2019). There are 178 essential genes for *P.*  
1017 *berghei*'s growth simulating liver-stage conditions (Stanway et al., 2019). Here, we identified  
1018 the substrates of those essential metabolic enzymes, which comprise a set of 328 metabolites  
1019 (Table S5). To further minimize on the host cell, we filtered out those *Plasmodium* enzymes  
1020 that share 4<sup>th</sup> level E.C. with human essential enzymes. We used available CRISPR gene  
1021 essentiality data in various human cell lines (Wang et al., 2015) to identify essential genes and  
1022 enzymes in human cells (Table S5). We further identified essential metabolites in human cells  
1023 (Table S5) using the latest human genome-scale metabolic model (Robinson et al., 2020) and  
1024 the metabolic information associated to the essential human genes. Subtracting essential  
1025 parasite and human enzymes resulted in the analysis of 32 essential *Plasmodium* enzymes  
1026 catalyzing 68 metabolites and 157 unique metabolite-enzyme pairs in the parasite (Table S6).

1027

#### 1028 **Identification of drugs to target malaria and minimize side effects on human cells**

1029 Those molecules that themselves and their downstream products cannot act as inhibitors of  
1030 essential metabolic enzymes in the human host cell while they can target essential  
1031 *Plasmodium* enzymes are attractive antimalarial candidates.

1032 We first used NICEdrug.ch to look for small molecules that share reactive site with the 32  
1033 essential *Plasmodium* enzymes and they have good similarity score in reactive site  
1034 neighborhood to native substrates of essential enzymes of parasite, i.e. NICEdrug score above  
1035 0.5 (Table S6). We also identified prodrugs that might lead to downstream products with  
1036 similar reactive site and neighborhood (NICEdrug above 0.5) to any of the essential  
1037 *Plasmodium* metabolites (Table S6). We suggest those drugs and downstream products act  
1038 as antimetabolites and competitively inhibit the essential enzymes in the parasite. Overall,  
1039 we identified 516 drugs that directly compete with essential metabolites and 1,164 prodrugs  
1040 that need to be biochemically modified between one to three times in human cell to render  
1041 inhibition of essential enzymes.

1042 We next combined information of essential *Plasmodium* and human metabolites to screen  
1043 further the drug search using NICEdrug.ch. Out of the hypothetical 516 antimalarial  
1044 candidates, we identified 64 drugs that share reactive site with parasite metabolites  
1045 (NICEdrug score above 0.5) and not with human metabolites (NICEdrug score below 0.5),  
1046 making them good candidates for drug design (Table S6).

1047

### 1048 **Prediction of inhibitors among food based molecules**

1049 We used the reactive site-centric fingerprint available in NICEdrug.ch to identify molecules in  
1050 food that share reactive site with native substrates of human enzymes and hence might  
1051 inhibit those enzymes. We retrieved the total set of 80,000 compounds from FooDB (Scalbert  
1052 et al., 2011), and treated them as input molecules into the NICEdrug pipeline (Figure 1) to  
1053 identify reactive sites and evaluate their biochemistry, as done for all molecules in  
1054 NICEdrug.ch.

1055

### 1056 **Identification of small molecules to target COVID-19**

1057 A recent study reported 332 host factors of SARS-CoV-2 (Gordon et al., 2020). Out of the 332  
1058 proteins, 97 have catalytic function and EC number assigned, and are potential targets of  
1059 small molecules. We evaluated the druggability of these 97 enzymes using NICEdrug.ch.

1060 To generate a druggability report, NICEdrug.ch first gathers the metabolic reactions  
1061 associated with the protein EC numbers. NICEdrug.ch uses 11 databases (including HMR,  
1062 MetaCyc, KEGG, MetaNetX, Reactome, Rhea, Model SEED, BKMS, BiGG models and Brenda)  
1063 as source of metabolic reactions. All these databases involve a total of 60k unique metabolic  
1064 reactions.

1065 Out of the 97 host factor enzymes, we identified 22 enzymes that are linked to fully-defined  
1066 metabolic reactions. Fully-defined metabolic reactions fulfill three criteria. (1) There is a  
1067 secondary structure available for all the reaction participants, which means there are  
1068 available mol files. (2) There is a fully defined molecular structure for all the reaction  
1069 participants, which means molecules with unspecified R chains are discarded. (3) There is a  
1070 BNICE.ch enzymatic reaction rule assigned to the reaction (Table S7).

1071 NICEdrug.ch identified 22 host factor enzymes with 24 unique linked EC numbers and 145  
1072 unique fully defined reactions. NICEdrug.ch extracts the metabolites participating in these  
1073 reactions and identifies their reactive site for a reactive-site centric similarity evaluation  
1074 against a list of molecules. To this end, NICEdrug.ch reports the list of molecules ranked based  
1075 on the NICEdrug score. The molecule with the highest NICEdrug score shares the highest  
1076 reactive site-centric similarity with the native substrate of the target enzyme (Table S7).

1077 We found 1,301 molecules that show NICEdrug score above 0.5 with respect to substrates of  
1078 the 22 SARS-CoV-2 hijacked enzymes (Table S7). Out of 1,301 molecules, 465 are drugs

1079 cataloged in DrugBank, KEGG drugs or ChEMBL databases, 712 are active molecules one step  
1080 away of 1,419 prodrugs, and 402 are food molecules (Table S7).

1081 To better understand the classes of drugs or food molecules, we classified drugs based on  
1082 their KEGG drug groups (Dgroups) and food molecules based on their food source. Out of 465  
1083 drugs identified, 43 drugs are assigned to 55 different Dgroups and 402 food molecules belong  
1084 to 74 different food sources (Table S7).

1085

#### 1086 **Supplemental table titles and legends**

1087 **Table S1. Information of human metabolism considered in this study, related to Figures 2,**  
1088 **3, 4, 5, and 6.**

1089 **(A)** List of cofactors, **(B)** list of metabolites, and **(C)** list of E.C. numbers considered in BNICE.ch  
1090 for the generation of reactions in the analysis of drug metabolism in a human cell (Materials  
1091 and Methods).

1092

1093 **Table S2. Metabolic neighborhood of 5-FU, related to Figures 2, 3, and 4.**

1094 **(1)** List of compounds in the 5-FU metabolic neighborhood including up to four reactions or  
1095 steps away. **(2)** Description of reactions in the 5-FU metabolic neighborhood including up to  
1096 four reactions or steps away.

1097

1098 **Table S3. NICEdrug score between all molecules with reactive site of statins in NICEdrug.ch,**  
1099 **related to Figure 5.**

1100 Matrix of NICEdrug score between each pair of the whole set of 254 molecules in NICEdrug.ch  
1101 with reactive site of statins.

1102

1103 **Table S4. Description of nine drugs candidates for repurposing to replace statins based on**  
1104 **NICEdrug.ch, related to Figure 5.**

1105 These drugs can act as competitive inhibitors of HMG-CoA reductase like statins.

1106

1107 **Table S5. Essential genes or enzymes and linked metabolites in liver-stage *Plasmodium* and**  
1108 **a human cell, related to Figure 6.**

1109 **(A)** List of essential genes and associated reactions in liver-stage *Plasmodium*, as obtained  
1110 from the study (Stanway et al., 2019) **(B)** List of essential genes and associated reactions in a

1111 human cell, as obtained from the study (Wang et al., 2015) **(C)** List of metabolites linked to  
1112 essential genes in liver-stage *Plasmodium*. **(D)** List of metabolites linked to essential genes in  
1113 a human cell.

1114

1115 **Table S6. Description of drugs, prodrugs, metabolites and enzymes analyzed in the study of**  
1116 **malaria, related to Figure 6**

1117 **(A)** NICEdrug druggability analysis of essential genes or enzymes in liver-stage *Plasmodium*:  
1118 all drugs sharing reactive-site centric similarity with the *Plasmodium* metabolites and  
1119 comparison with human metabolites. **(B)** NICEdrug druggability analysis of essential genes or  
1120 enzymes in liver-stage *Plasmodium*: all prodrugs (up to three steps away of 346 drugs) sharing  
1121 reactive-site centric similarity with the *Plasmodium* metabolites and comparison with human  
1122 metabolites. **(C)** Description of drugs and prodrugs identified in the malaria analysis with  
1123 NICEdrug.ch and validated in the study by (Antonova-Koch et al., 2018) along with their similar  
1124 *Plasmodium* metabolite and human metabolite.

1125

1126 **Table S7. Hijacked human enzymes by SARS-CoV-2, and drugs and food-based compounds**  
1127 **that can inhibit them based on the NICEdrug score, related to Figure 7.**

1128 **(A)** Hijacked human proteins by SARS-CoV-2 as identified by (Gordon et al., 2020) with an  
1129 annotated enzymatic function (E.C. number), also called here "SARS-CoV-2 hijacked  
1130 enzymes". **(B)** NICEdrug druggability report for SARS-CoV-2 hijacked enzymes including all  
1131 NICEdrug small molecules. **(C)** Best candidate drugs against COVID-19: NICEdrug druggability  
1132 report for SARS-CoV-2 hijacked enzymes including drugs with NICEdrug score above 0.5  
1133 compared to the native human substrate. **(D)** Summary of NICEdrug best candidate drugs  
1134 against COVID-19 and their classification according to the drug category in the KEGG  
1135 database. **(E)** NICEdrug druggability report of SARS-CoV-2 hijacked enzymes including  
1136 prodrugs (up to three steps away of any NICEdrug small molecule) with NICEdrug score above  
1137 0.5 compared to the native human substrate. **(F)** Best candidate food-based molecules  
1138 against COVID-19: NICEdrug druggability report of SARS-CoV-2 hijacked enzymes including  
1139 food-based molecules with NICEdrug score above 0.5 compared to the native human  
1140 substrate. **(G)** Summary of the NICEdrug best candidate food-based molecules against COVID-  
1141 19 and their classification according to the foodDB source.

1142

1143 **Table S8. NICEdrug analysis of inhibitory mechanisms of currently used anti SARS-CoV-2**  
1144 **drugs, related to Figure 7.**

1145 **(A)** All drug molecules and **(B)** prodrugs in NICEdrug.ch sharing reactive site with the native  
1146 substrates of the human enzyme HDAC2 and their NICEdrug score with this substrate. **(C)** All  
1147 molecules cataloged in fooDB sharing reactive site with the native substrates of the human  
1148 enzyme HDAC2 and their NICEdrug score with this substrate. **(D)** All drug molecules and **(E)**  
1149 prodrug molecules in NICEdrug.ch sharing reactive site with the native substrates of the  
1150 human enzyme ACE2 and their NICEdrug score with this substrate. **(F)** All molecules cataloged  
1151 in fooDB sharing reactive site with the native substrates of the human enzyme ACE2 and their  
1152 NICEdrug score with this substrate. **(G)** All molecules in NICEdrug.ch or cataloged in fooDB  
1153 sharing reactive site with the native substrates of the human enzyme DNA-directed RNA  
1154 polymerase and their NICEdrug score with this substrate.

1155

## References

- 1156  
1157  
1158  
1159  
1160  
1161  
1162  
1163  
1164  
1165  
1166  
1167  
1168  
1169  
1170  
1171  
1172  
1173  
1174  
1175  
1176  
1177  
1178  
1179  
1180  
1181  
1182  
1183  
1184  
1185  
1186  
1187  
1188  
1189  
1190
- Abdel-Atty, M.M., Farag, N.A., Kassab, S.E., Serya, R.A.T., and Abouzid, K.A.M. (2014). Design, synthesis, 3D pharmacophore, QSAR, and docking studies of carboxylic acid derivatives as Histone Deacetylase inhibitors and cytotoxic agents. *Bioorganic Chem.* *57*, 65–82.
- Alakwaa, F.M. (2020). Repurposing Didanosine as a Potential Treatment for COVID-19 Using Single-Cell RNA Sequencing Data. *MSystems* *5*.
- Antonova-Koch, Y., Meister, S., Abraham, M., Luth, M.R., Otilie, S., Lukens, A.K., Sakata-Kato, T., Vanaerschot, M., Owen, E., Jado, J.C., et al. (2018). Open-source discovery of chemical leads for next-generation chemoprotective antimalarials. *Science* *362*, eaat9446.
- Ariens, E.J. (2012). *Molecular Pharmacology V3: The Model of Action of Biology Active Compounds* (Elsevier).
- Bielas, J.H., Schmitt, M.W., Icreverzi, A., Ericson, N.G., and Loeb, L.A. (2009). Molecularly Evolved Thymidylate Synthase Inhibits 5-Fluorodeoxyuridine Toxicity in Human Hematopoietic Cells. *Hum. Gene Ther.* *20*, 1703–1707.
- Brilisauer, K., Rapp, J., Rath, P., Schöllhorn, A., Bleul, L., Weiß, E., Stahl, M., Grond, S., and Forchhammer, K. (2019). Cyanobacterial antimetabolite 7-deoxy-sedoheptulose blocks the shikimate pathway to inhibit the growth of prototrophic organisms. *Nat. Commun.* *10*, 545.
- Brunk, E., Sahoo, S., Zielinski, D.C., Altunkaya, A., Dräger, A., Mih, N., Gatto, F., Nilsson, A., Gonzalez, G.A.P., Aurich, M.K., et al. (2018). Recon3D: A Resource Enabling A Three-Dimensional View of Gene Variation in Human Metabolism. *Nat. Biotechnol.* *36*, 272–281.
- Bushell, E., Gomes, A.R., Sanderson, T., Anar, B., Girling, G., Herd, C., Metcalf, T., Modrzynska, K., Schwach, F., Martin, R.E., et al. (2017). Functional Profiling of a Plasmodium Genome Reveals an Abundance of Essential Genes. *Cell* *170*, 260-272.e8.
- Cava, C., Bertoli, G., and Castiglioni, I. (2020). In Silico Discovery of Candidate Drugs against Covid-19. *Viruses* *12*, 404.
- Croft, D., O’Kelly, G., Wu, G., Haw, R., Gillespie, M., Matthews, L., Caudy, M., Garapati, P., Gopinath, G., Jassal, B., et al. (2011). Reactome: a database of reactions, pathways and biological processes. *Nucleic Acids Res.* *39*, D691–D697.
- Díaz-Quiroz, D.C., Cardona-Félix, C.S., Viveros-Ceballos, J.L., Reyes-González, M.A., Bolívar, F., Ordoñez, M., and Escalante, A. (2018). Synthesis, biological activity and molecular modelling studies of shikimic acid derivatives as inhibitors of the shikimate dehydrogenase enzyme of *Escherichia coli*. *J. Enzyme Inhib. Med. Chem.* *33*, 397–404.
- Dong, E., Du, H., and Gardner, L. (2020). An interactive web-based dashboard to track COVID-19 in real time. *Lancet Infect. Dis.* *20*, 533–534.
- Endo, A., and Hasumi, K. (1993). HMG-CoA reductase inhibitors. *Nat. Prod. Rep.* *10*, 541.

- 1191 Finley, S.D., Broadbelt, L.J., and Hatzimanikatis, V. (2009). Computational Framework for  
1192 Predictive Biodegradation. *Biotechnol. Bioeng.* *104*, 1086–1097.
- 1193 Ghattas, M.A., Raslan, N., Sadeq, A., Al Sorkhy, M., and Atatreh, N. (2016). Druggability  
1194 analysis and classification of protein tyrosine phosphatase active sites. *Drug Des. Devel. Ther.*  
1195 *10*, 3197–3209.
- 1196 Gordon, D.E., Jang, G.M., Bouhaddou, M., Xu, J., Obernier, K., White, K.M., O’Meara, M.J.,  
1197 Rezelj, V.V., Guo, J.Z., Swaney, D.L., et al. (2020). A SARS-CoV-2 protein interaction map reveals  
1198 targets for drug repurposing. *Nature*.
- 1199 Guengerich, F.P. (2011). Mechanisms of Drug Toxicity and Relevance to Pharmaceutical  
1200 Development. *Drug Metab. Pharmacokinet.* *26*, 3–14.
- 1201 Hadadi, N., and Hatzimanikatis, V. (2015). Design of computational retrobiosynthesis tools for  
1202 the design of de novo synthetic pathways. *Curr. Opin. Chem. Biol.* *28*, 99–104.
- 1203 Hadadi, N., Hafner, J., Shajkofci, A., Zisaki, A., and Hatzimanikatis, V. (2016). ATLAS of  
1204 Biochemistry: A Repository of All Possible Biochemical Reactions for Synthetic Biology and  
1205 Metabolic Engineering Studies. *ACS Synth. Biol.* *5*, 1155–1166.
- 1206 Hadadi, N., MohammadiPeyhani, H., Miskovic, L., Seijo, M., and Hatzimanikatis, V. (2019).  
1207 Enzyme annotation for orphan and novel reactions using knowledge of substrate reactive  
1208 sites. *Proc. Natl. Acad. Sci.* 201818877.
- 1209 Hafner, J., MohammadiPeyhani, H., Sveshnikova, A., Scheidegger, A., and Hatzimanikatis, V.  
1210 (2020). Updated ATLAS of Biochemistry with New Metabolites and Improved Enzyme  
1211 Prediction Power. *ACS Synth. Biol.* *9*, 1479–1482.
- 1212 Hatzimanikatis, V., Li, C., Ionita, J.A., Henry, C.S., Jankowski, M.D., and Broadbelt, L.J. (2005).  
1213 Exploring the diversity of complex metabolic networks. *Bioinformatics* *21*, 1603–1609.
- 1214 Henry, C.S., Broadbelt, L.J., and Hatzimanikatis, V. (2010). Discovery and analysis of novel  
1215 metabolic pathways for the biosynthesis of industrial chemicals: 3-hydroxypropanoate.  
1216 *Biotechnol. Bioeng.* n/a-n/a.
- 1217 Istvan, E.S. (2001). Structural Mechanism for Statin Inhibition of HMG-CoA Reductase. *Science*  
1218 *292*, 1160–1164.
- 1219 Jankowski, M.D., Henry, C.S., Broadbelt, L.J., and Hatzimanikatis, V. (2008). Group Contribution  
1220 Method for Thermodynamic Analysis of Complex Metabolic Networks. *Biophys. J.* *95*, 1487–  
1221 1499.
- 1222 Jarvis, A., and Ouvry, G. (2019). Essential ingredients for rational drug design. *Bioorg. Med.*  
1223 *Chem. Lett.* *29*, 126674.
- 1224 Javdan, B., Lopez, J.G., Chankhamjon, P., Lee, Y.-C.J., Hull, R., Wu, Q., Wang, X., Chatterjee, S.,  
1225 and Donia, M.S. (2020). Personalized Mapping of Drug Metabolism by the Human Gut  
1226 Microbiome. *Cell*.

- 1227 Jeon, S., Ko, M., Lee, J., Choi, I., Byun, S.Y., Park, S., Shum, D., and Kim, S. (2020). Identification  
1228 of antiviral drug candidates against SARS-CoV-2 from FDA-approved drugs. *Antimicrob. Agents*  
1229 *Chemother.* AAC.00819-20.
- 1230 Jiang, S.-Y., Li, H., Tang, J.-J., Wang, J., Luo, J., Liu, B., Wang, J.-K., Shi, X.-J., Cui, H.-W., Tang, J.,  
1231 et al. (2018). Discovery of a potent HMG-CoA reductase degrader that eliminates statin-  
1232 induced reductase accumulation and lowers cholesterol. *Nat. Commun.* *9*, 5138.
- 1233 Kim, H.M., Shin, D.R., Yoo, O.J., Lee, H., and Lee, J.-O. (2003). Crystal structure of *Drosophila*  
1234 angiotensin I-converting enzyme bound to captopril and lisinopril 1. *FEBS Lett.* *538*, 65–70.
- 1235 Ko, M., Chang, S.Y., Byun, S.Y., Choi, I., d’Alexandry d’Orengiani, A.-L.P.H., Shum, D., Min, J.-Y.,  
1236 and Windisch, M.P. (2020). Screening of FDA-approved drugs using a MERS-CoV clinical isolate  
1237 from South Korea identifies potential therapeutic options for COVID-19. *BioRxiv*  
1238 2020.02.25.965582.
- 1239 Kobayakawa, M., and Kojima, Y. (2011). Tegafur/gimeracil/oteracil (S-1) approved for the  
1240 treatment of advanced gastric cancer in adults when given in combination with cisplatin: a  
1241 review comparing it with other fluoropyrimidine-based therapies. *OncoTargets Ther.* *4*, 193–  
1242 201.
- 1243 Kong, W., Wei, J., Abidi, P., Lin, M., Inaba, S., Li, C., Wang, Y., Wang, Z., Si, S., Pan, H., et al.  
1244 (2004). Berberine is a novel cholesterol-lowering drug working through a unique mechanism  
1245 distinct from statins. *Nat. Med.* *10*, 1344–1351.
- 1246 Krauß, J., and Bracher, F. (2018). Pharmacokinetic Enhancers (Boosters)—Escort for Drugs  
1247 against Degrading Enzymes and Beyond. *Sci. Pharm.* *86*, 43.
- 1248 Levenshtein, V.I. (1966). Binary Codes Capable of Correcting Deletions, Insertions and  
1249 Reversals. *Sov. Phys. Dokl.* *10*, 707.
- 1250 Li, S., Li, Q., Li, Y., Li, L., Tian, H., and Sun, X. (2015). Acetyl-L-Carnitine in the Treatment of  
1251 Peripheral Neuropathic Pain: A Systematic Review and Meta-Analysis of Randomized  
1252 Controlled Trials. *PLoS ONE* *10*.
- 1253 Lim, N.H., Kashiwagi, M., Visse, R., Jones, J., Enghild, J.J., Brew, K., and Nagase, H. (2010).  
1254 Reactive-site mutants of N-TIMP-3 that selectively inhibit ADAMTS-4 and ADAMTS-5:  
1255 biological and structural implications. *Biochem. J.* *431*, 113–122.
- 1256 Lipinski, C.A., Lombardo, F., Dominy, B.W., and Feeney, P.J. (2001). Experimental and  
1257 computational approaches to estimate solubility and permeability in drug discovery and  
1258 development settings1PII of original article: S0169-409X(96)00423-1. The article was  
1259 originally published in *Advanced Drug Delivery Reviews* *23* (1997) 3–25.1. *Adv. Drug Deliv. Rev.*  
1260 *46*, 3–26.
- 1261 Lodigiani, C., Iapichino, G., Carenzo, L., Cecconi, M., Ferrazzi, P., Sebastian, T., Kucher, N., Studt,  
1262 J.-D., Sacco, C., Alexia, B., et al. (2020). Venous and arterial thromboembolic complications in  
1263 COVID-19 patients admitted to an academic hospital in Milan, Italy. *Thromb. Res.* *191*, 9–14.



- 1264 Longley, D.B., Harkin, D.P., and Johnston, P.G. (2003). 5-Fluorouracil: mechanisms of action  
1265 and clinical strategies. *Nat. Rev. Cancer* 3, 330–338.
- 1266 Ma, W.W., Saif, M.W., El-Rayes, B.F., Fakih, M.G., Cartwright, T.H., Posey, J.A., King, T.R., von  
1267 Borstel, R.W., and Bamat, M.K. (2017). Emergency use of uridine triacetate for the prevention  
1268 and treatment of life-threatening 5-fluorouracil and capecitabine toxicity. *Cancer* 123, 345–  
1269 356.
- 1270 Mahmoudian, M., and Rahimi-Moghaddam, P. (2009). The anti-cancer activity of noscapine:  
1271 a review. *Recent Patents Anticancer Drug Discov.* 4, 92–97.
- 1272 Mårtensson, J., Gustafsson, J., and Larsson, A. (1989). A therapeutic trial with N-acetylcysteine  
1273 in subjects with hereditary glutathione synthetase deficiency (5-oxoprolinuria). *J. Inherit.*  
1274 *Metab. Dis.* 12, 120–130.
- 1275 Matsuda, R., Bi, C., Anguizola, J., Sobansky, M., Rodriguez, E., Badilla, J.V., Zheng, X., Hage, B.,  
1276 and Hage, D.S. (2014). STUDIES OF METABOLITE-PROTEIN INTERACTIONS: A REVIEW. *J.*  
1277 *Chromatogr. B Analyt. Technol. Biomed. Life. Sci.* 966, 48.
- 1278 Mulhaupt, F., Matter, C.M., Kwak, B.R., Pelli, G., Veillard, N.R., Burger, F., Graber, P., Lüscher,  
1279 T.F., and Mach, F. (2003). Statins (HMG-CoA reductase inhibitors) reduce CD40 expression in  
1280 human vascular cells. *Cardiovasc. Res.* 59, 755–766.
- 1281 O’Boyle, N.M., Banck, M., James, C.A., Morley, C., Vandermeersch, T., and Hutchison, G.R.  
1282 (2011). Open Babel: An open chemical toolbox. *J. Cheminformatics* 3, 33.
- 1283 Papadatos, G., and Brown, N. (2013). In silico applications of bioisosterism in contemporary  
1284 medicinal chemistry practice. *Wiley Interdiscip. Rev. Comput. Mol. Sci.* 3, 339–354.
- 1285 Park, Y.-J., Walls, A.C., Wang, Z., Sauer, M.M., Li, W., Tortorici, M.A., Bosch, B.-J., DiMaio, F.,  
1286 and Veesler, D. (2019). Structures of MERS-CoV spike glycoprotein in complex with sialoside  
1287 attachment receptors. *Nat. Struct. Mol. Biol.* 26, 1151–1157.
- 1288 Pornputtapong, N., Nookaew, I., and Nielsen, J. (2015). Human metabolic atlas: an online  
1289 resource for human metabolism. *Database J. Biol. Databases Curation* 2015.
- 1290 Rajesh, A., and International, C. (2011). *Medicinal plant biotechnology* (Cambridge, MA: CABI).
- 1291 Robertson, J.G. (2005). Mechanistic Basis of Enzyme-Targeted Drugs. *Biochemistry* 44, 5561–  
1292 5571.
- 1293 Robinson, J.L., Kocabaş, P., Wang, H., Cholley, P.-E., Cook, D., Nilsson, A., Anton, M., Ferreira,  
1294 R., Domenzain, I., Billa, V., et al. (2020). An atlas of human metabolism. *Sci. Signal.* 13,  
1295 eaaz1482.
- 1296 Sartorelli, A.C., and Johns, D.G. (2013). *Antineoplastic and Immunosuppressive Agents: Part I*  
1297 (Springer Science & Business Media).

- 1298 Scalbert, A., Andres-Lacueva, C., Arita, M., Kroon, P., Manach, C., Urpi-Sarda, M., and Wishart,  
1299 D. (2011). Databases on food phytochemicals and their health-promoting effects. *J. Agric.*  
1300 *Food Chem.* *59*, 4331–4348.
- 1301 Schmidt, U., Struck, S., Gruening, B., Hossbach, J., Jaeger, I.S., Parol, R., Lindequist, U.,  
1302 Teuscher, E., and Preissner, R. (2009). SuperToxic: a comprehensive database of toxic  
1303 compounds. *Nucleic Acids Res.* *37*, D295–D299.
- 1304 Shilo, S., Rossman, H., and Segal, E. (2020). Axes of a revolution: challenges and promises of  
1305 big data in healthcare. *Nat. Med.* *26*, 29–38.
- 1306 Soh, K.C., and Hatzimanikatis, V. (2010). DREAMS of metabolism. *Trends Biotechnol.* *28*, 501–  
1307 508.
- 1308 Stanway, R.R., Bushell, E., Chiappino-Pepe, A., Roques, M., Sanderson, T., Franke-Fayard, B.,  
1309 Caldelari, R., Golomingi, M., Nyonda, M., Pandey, V., et al. (2019). Genome-Scale Identification  
1310 of Essential Metabolic Processes for Targeting the Plasmodium Liver Stage. *Cell* *179*, 1112-  
1311 1128.e26.
- 1312 Stokes, J.M., Yang, K., Swanson, K., Jin, W., Cubillos-Ruiz, A., Donghia, N.M., MacNair, C.R.,  
1313 French, S., Carfrae, L.A., Bloom-Ackerman, Z., et al. (2020). A Deep Learning Approach to  
1314 Antibiotic Discovery. *Cell* *180*, 688-702.e13.
- 1315 Sushko, I., Salmina, E., Potemkin, V.A., Poda, G., and Tetko, I.V. (2012). ToxAlerts: a Web server  
1316 of structural alerts for toxic chemicals and compounds with potential adverse reactions. *J.*  
1317 *Chem. Inf. Model.* *52*, 2310–2316.
- 1318 Suzuki, M., Okuda, T., and Shiraki, K. (2006). Synergistic antiviral activity of acyclovir and  
1319 vidarabine against herpes simplex virus types 1 and 2 and varicella-zoster virus. *Antiviral Res.*  
1320 *72*, 157–161.
- 1321 Tanaka, Y., Sasaki, R., Fukui, F., Waki, H., Kawabata, T., Okazaki, M., Hasegawa, K., and Ando, S.  
1322 (2004). Acetyl-L-carnitine supplementation restores decreased tissue carnitine levels and  
1323 impaired lipid metabolism in aged rats. *J. Lipid Res.* *45*, 729–735.
- 1324 Testa, B. (2010). Principles of Drug Metabolism. In *Burger’s Medicinal Chemistry and Drug*  
1325 *Discovery*, (American Cancer Society), pp. 403–454.
- 1326 Thakkar, S., Chen, M., Fang, H., Liu, Z., Roberts, R., and Tong, W. (2018). The Liver Toxicity  
1327 Knowledge Base (LKTb) and drug-induced liver injury (DILI) classification for assessment of  
1328 human liver injury. *Expert Rev. Gastroenterol. Hepatol.* *12*, 31–38.
- 1329 Tokic, M., Hadadi, N., Ataman, M., Neves, D., Ebert, B.E., Blank, L.M., Miskovic, L., and  
1330 Hatzimanikatis, V. (2018). Discovery and Evaluation of Biosynthetic Pathways for the  
1331 Production of Five Methyl Ethyl Ketone Precursors. *ACS Synth. Biol.* *7*, 1858–1873.
- 1332 US Preventive Services Task Force (2016). Statin Use for the Primary Prevention of  
1333 Cardiovascular Disease in Adults: US Preventive Services Task Force Recommendation  
1334 Statement. *JAMA* *316*, 1997–2007.

- 1335 Vamathevan, J., Clark, D., Czodrowski, P., Dunham, I., Ferran, E., Lee, G., Li, B., Madabhushi,  
1336 A., Shah, P., Spitzer, M., et al. (2019). Applications of machine learning in drug discovery and  
1337 development. *Nat. Rev. Drug Discov.* *18*, 463–477.
- 1338 Verlinde, C.L., and Hol, W.G. (1994). Structure-based drug design: progress, results and  
1339 challenges. *Structure* *2*, 577–587.
- 1340 Wang, T., Birsoy, K., Hughes, N.W., Krupczak, K.M., Post, Y., Wei, J.J., Lander, E.S., and Sabatini,  
1341 D.M. (2015). Identification and characterization of essential genes in the human genome.  
1342 *Science* *350*, 1096.
- 1343 Wassilew, S. (2005). Brivudin compared with famciclovir in the treatment of herpes zoster:  
1344 effects in acute disease and chronic pain in immunocompetent patients. A randomized,  
1345 double-blind, multinational study. *J. Eur. Acad. Dermatol. Venereol. JEADV* *19*, 47–55.
- 1346 Weininger, D. (1988). SMILES, a chemical language and information system. 1. Introduction to  
1347 methodology and encoding rules. *J. Chem. Inf. Comput. Sci.* *28*, 31–36.
- 1348 Wishart, D.S., Feunang, Y.D., Marcu, A., Guo, A.C., Liang, K., Vázquez-Fresno, R., Sajed, T.,  
1349 Johnson, D., Li, C., Karu, N., et al. (2018). HMDB 4.0: the human metabolome database for  
1350 2018. *Nucleic Acids Res.* *46*, D608–D617.
- 1351 Wong, C.H., Siah, K.W., and Lo, A.W. (2019). Estimation of clinical trial success rates and related  
1352 parameters. *Biostatistics* *20*, 273–286.
- 1353 World Health Organization (2018). World Malaria Report 2018.
- 1354 Wu, Y., Si, F., Luo, L., Jing, F., Jiang, K., Zhou, J., and Yi, Q. (2018). The effect of melatonin on  
1355 cardio fibrosis in juvenile rats with pressure overload and deregulation of HDACs. *Korean J.*  
1356 *Physiol. Pharmacol. Off. J. Korean Physiol. Soc. Korean Soc. Pharmacol.* *22*, 607–616.
- 1357 Yang, H., Li, J., Wu, Z., Li, W., Liu, G., and Tang, Y. (2017). Evaluation of Different Methods for  
1358 Identification of Structural Alerts Using Chemical Ames Mutagenicity Data Set as a Benchmark.  
1359 *Chem Res Toxicol* *10*.
- 1360 Zhang, X.-J., Qin, J.-J., Cheng, X., Shen, L., Zhao, Y.-C., Yuan, Y., Lei, F., Chen, M.-M., Yang, H.,  
1361 Bai, L., et al. (2020). In-hospital Use of Statins is Associated with a Reduced Risk of Mortality  
1362 among Individuals with COVID-19. *Cell Metab.*

1363

# Figure 1

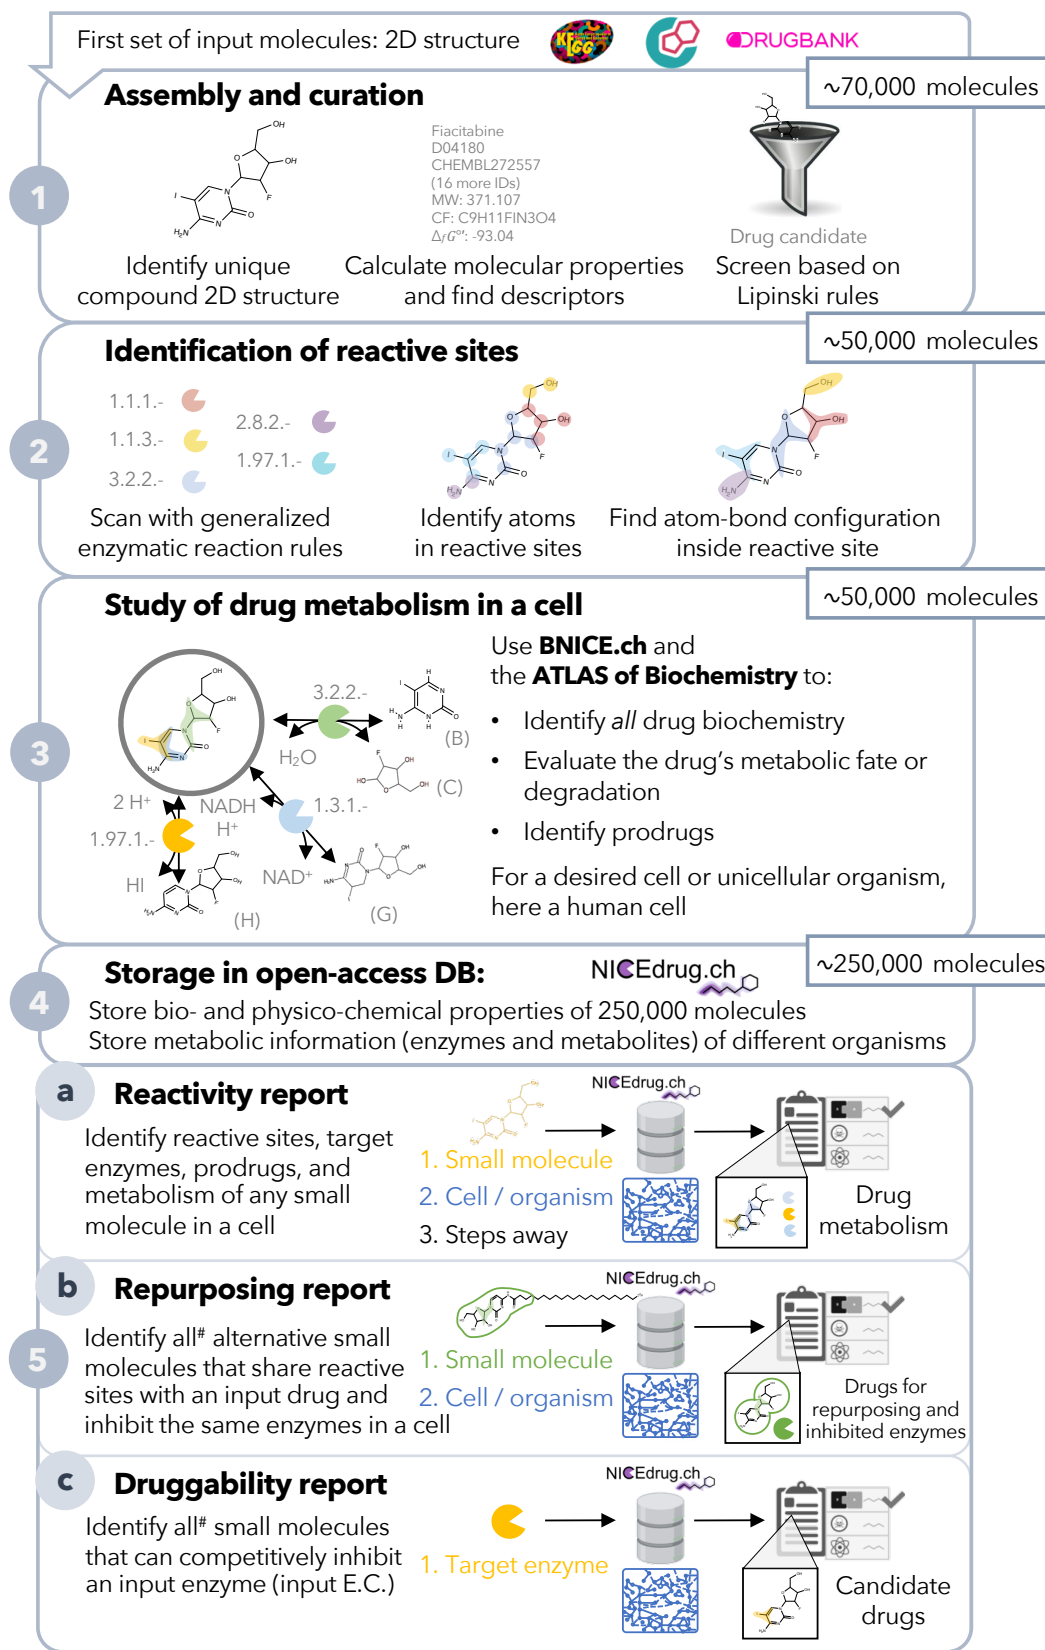

#among all small molecules in NICEdrug.ch, which will be continuously updated

# Figure 2

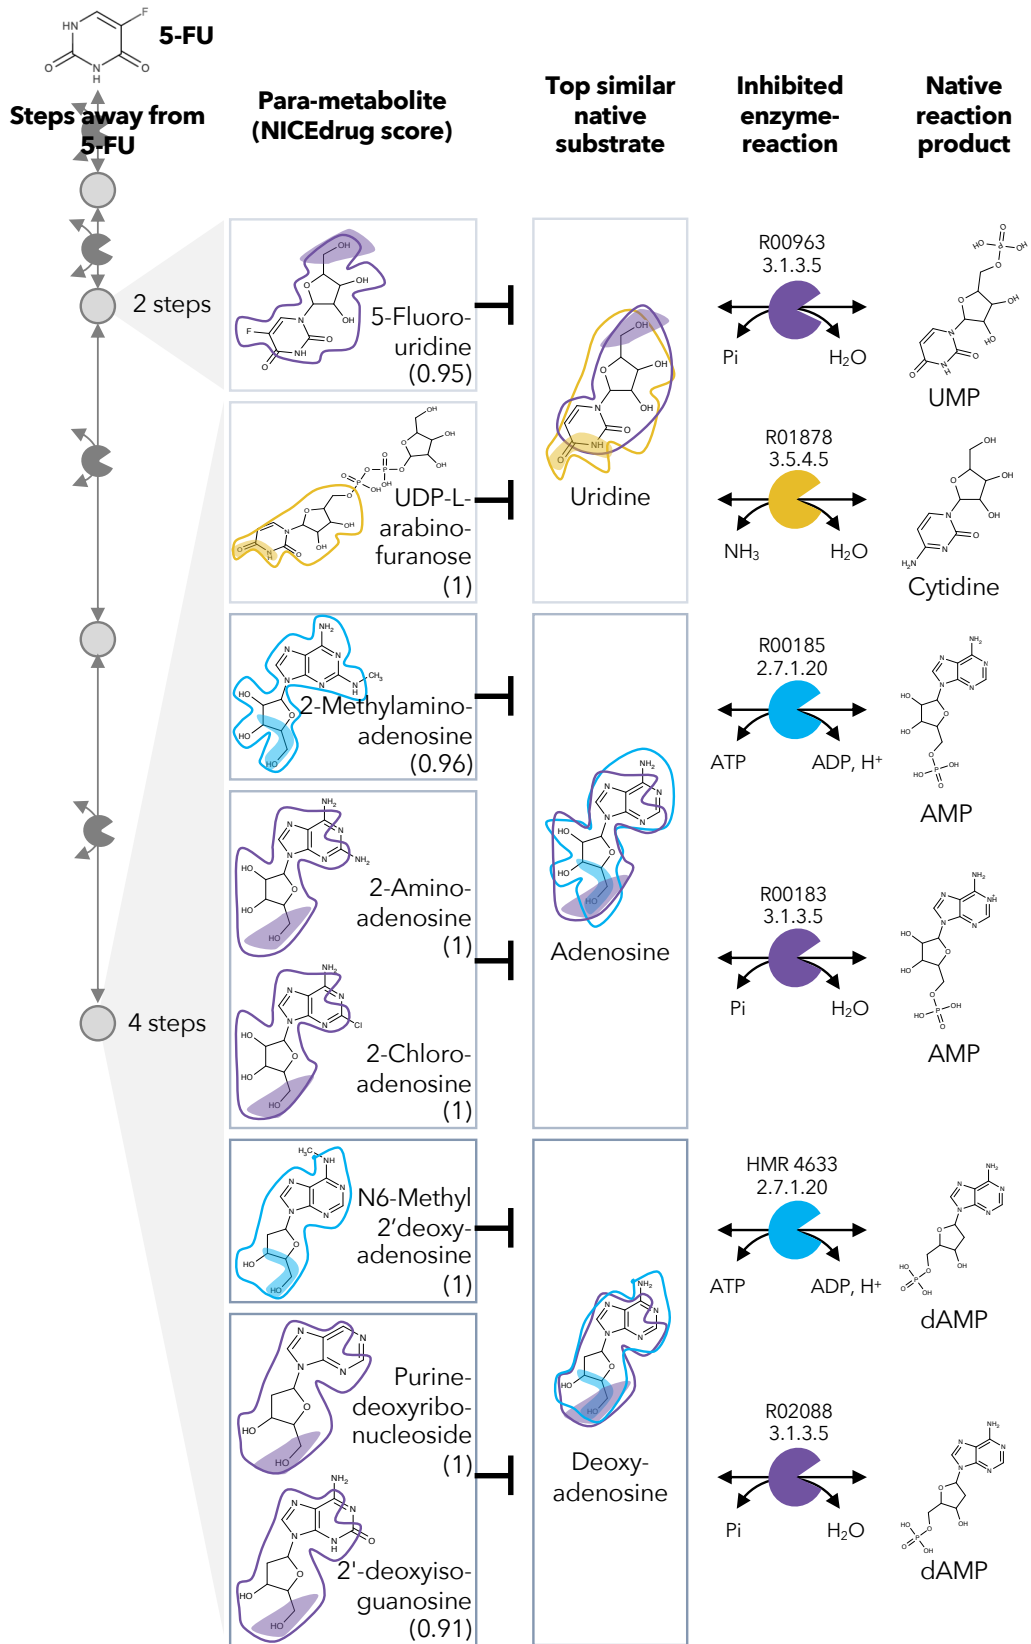

# Figure 3

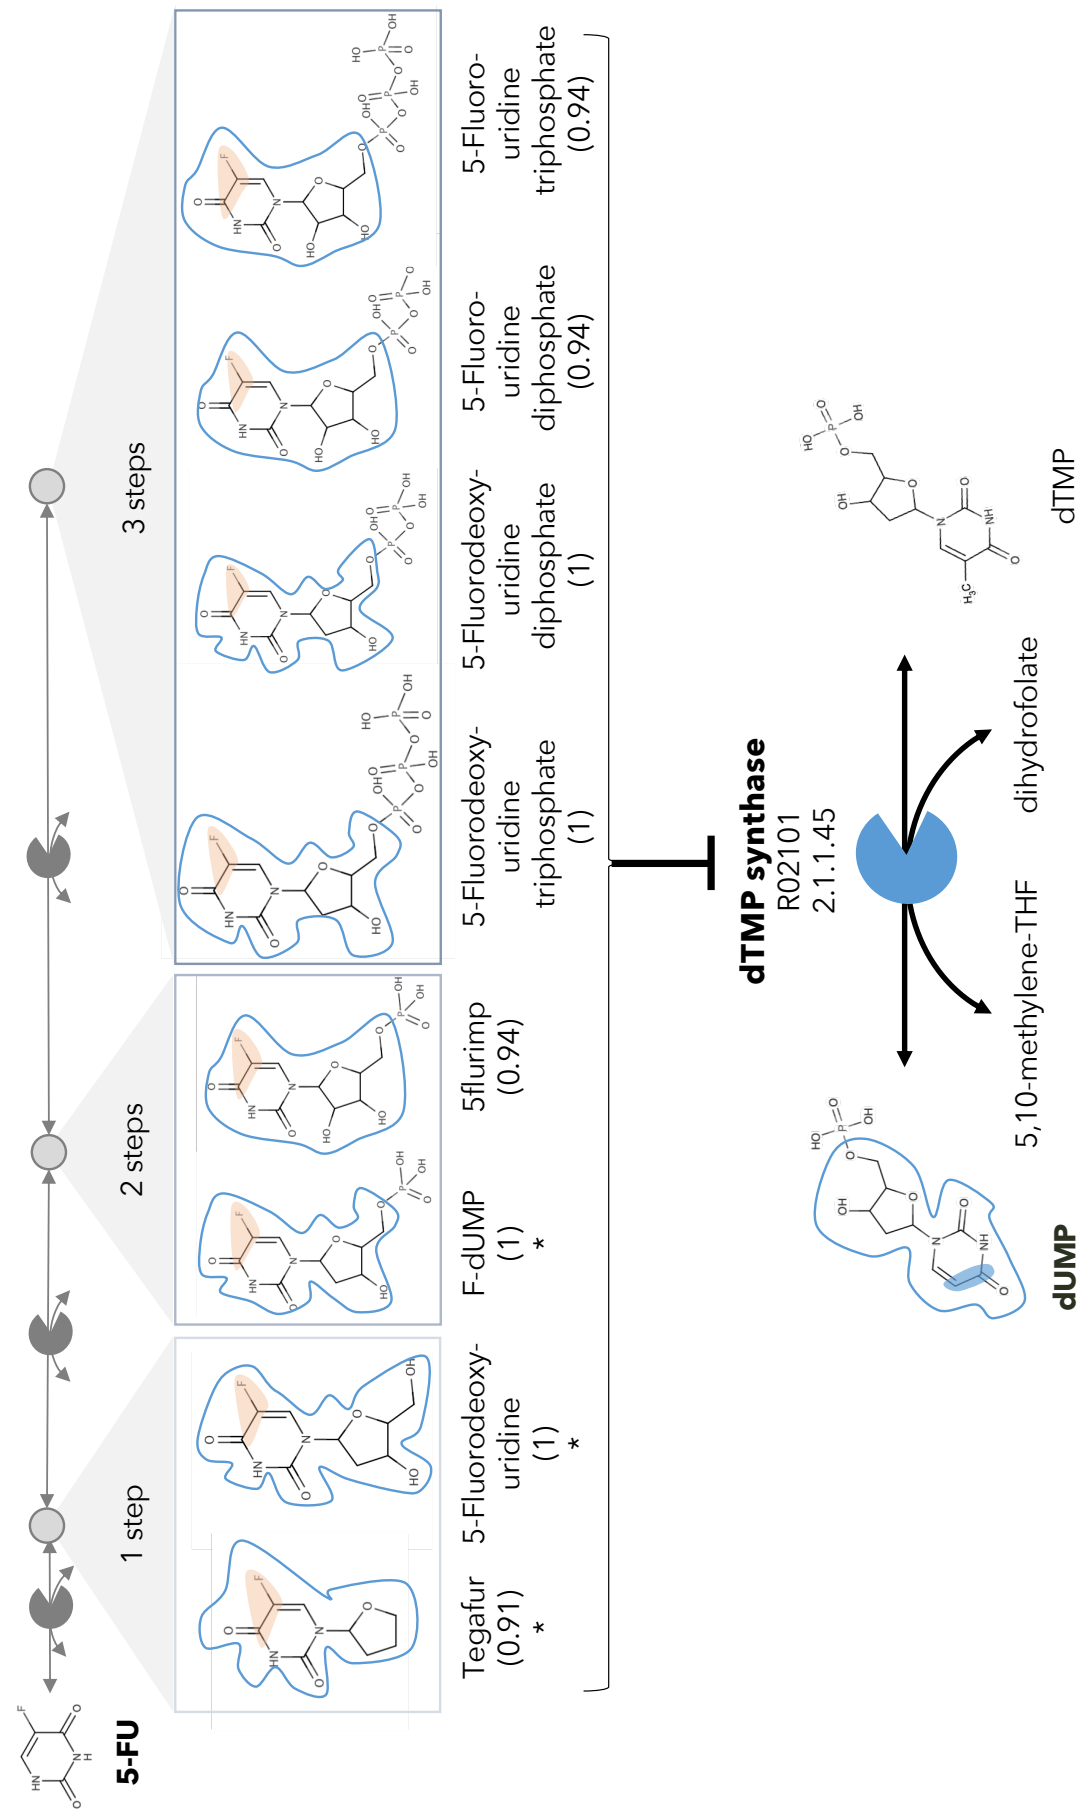

# Figure 4

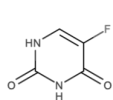

**Suggested toxic metabolic neighbor**  
(NICEdrug toxicity score)

**Supertoxic DB**  
(NICEdrug score, log(LC<sub>50</sub>), nalerts)

**Hepatotoxic DB**  
(NICEdrug score, severity, nalerts)

**5-FU**

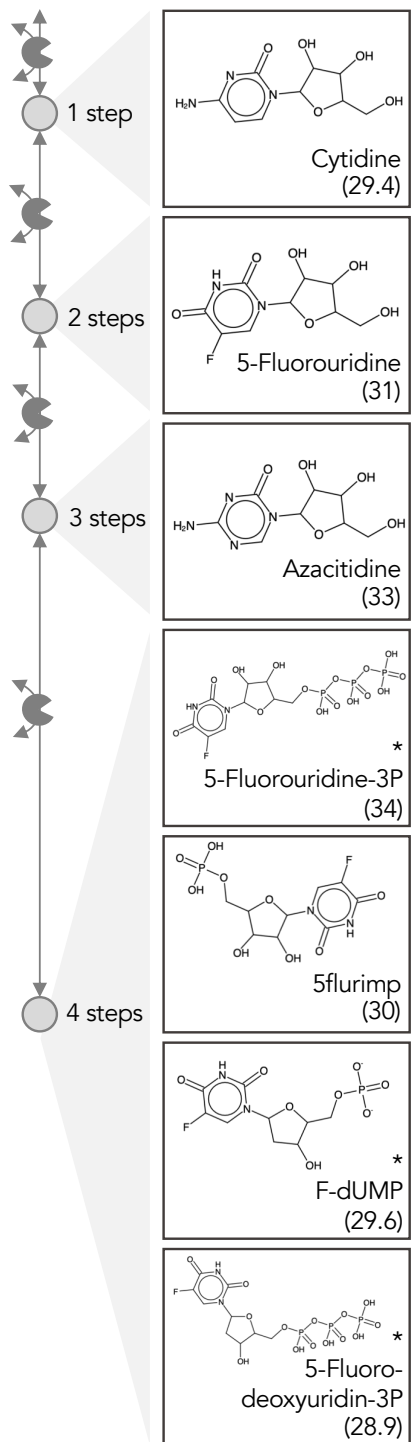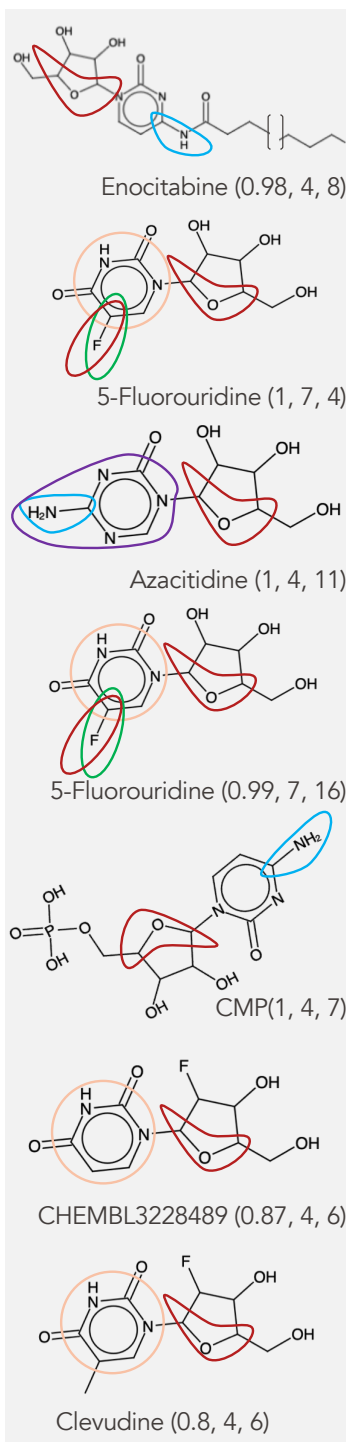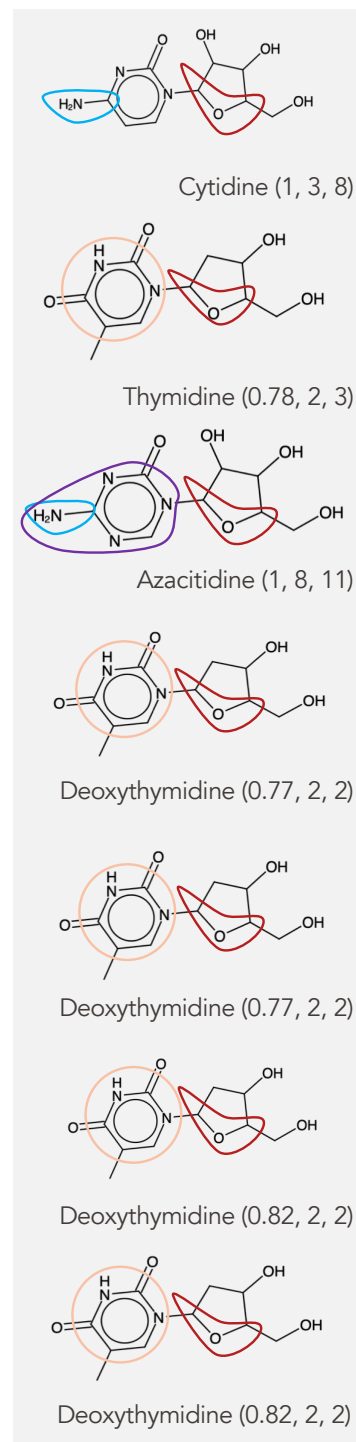

nalerts: number of NICEdrug common toxic alerts  
\* Toxicity validated

- Genotoxic carcinogenicity, mutagenicity
- Non-biodegradability
- Acute aquatic toxicity
- Pyridinium-related toxicity
- Skin sensitization

# Figure 5

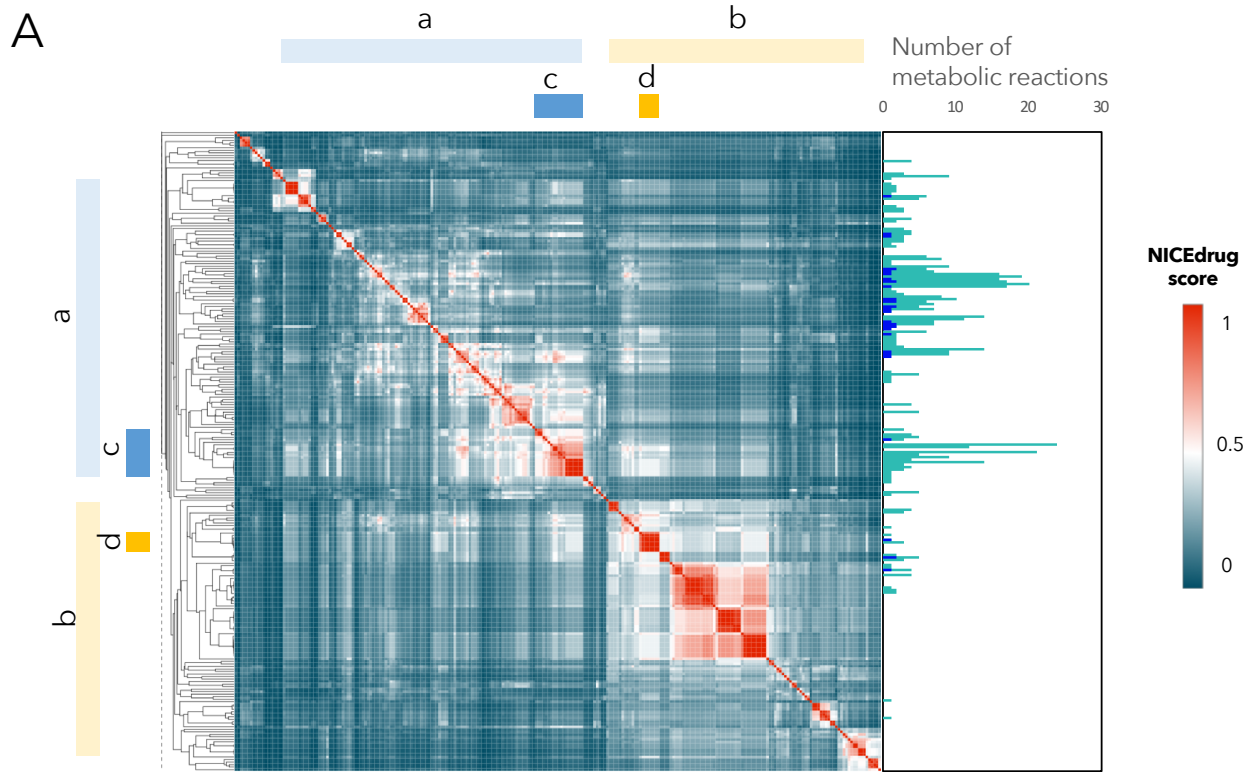

**B**

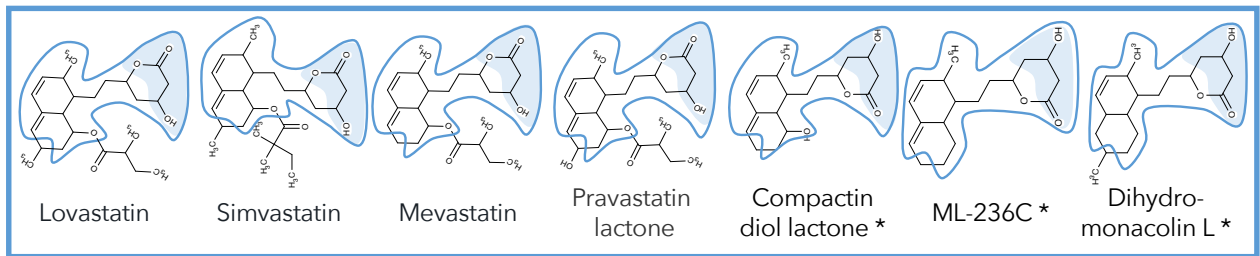

**C**

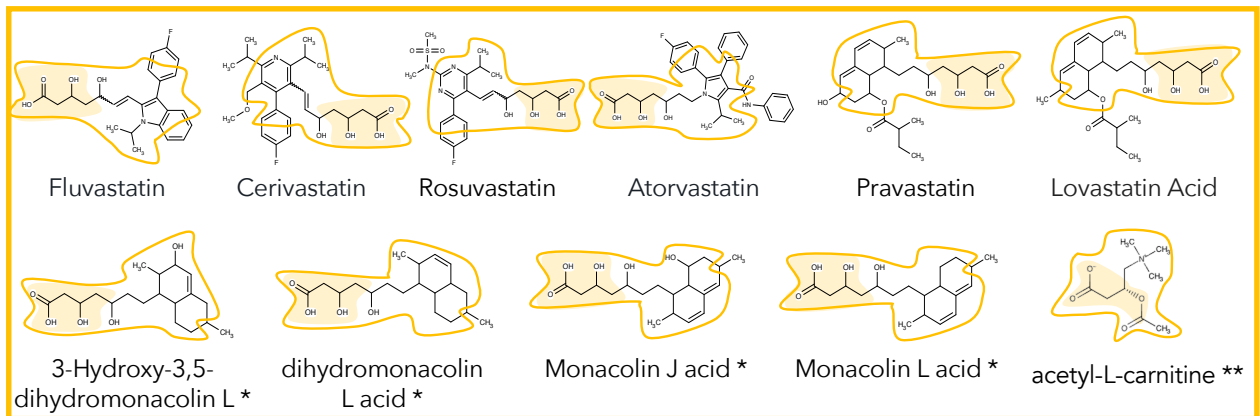



# Figure 6

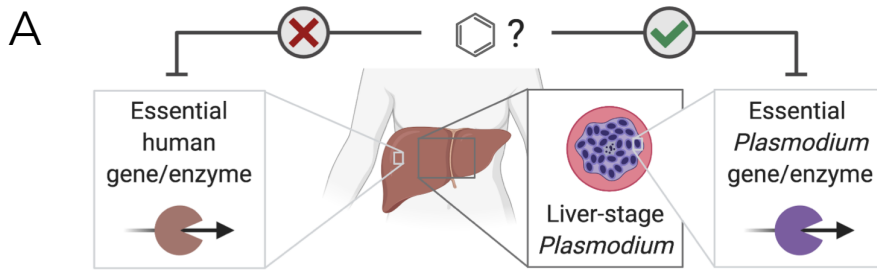

**B Steroid and Fatty acid elongation metabolism (KRC) inhibitors**

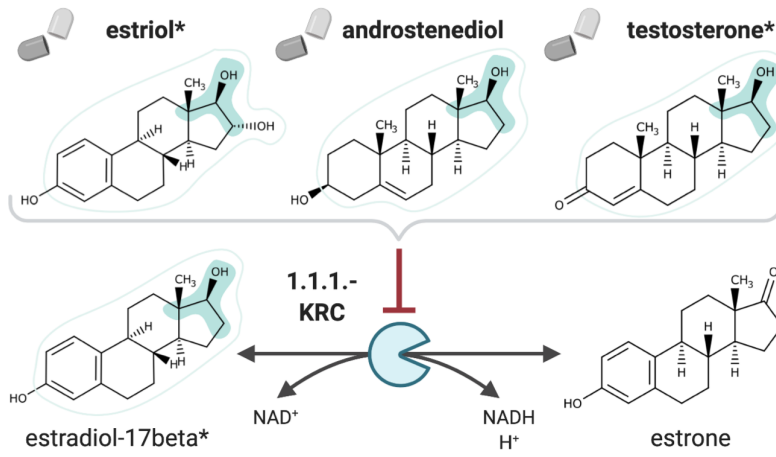

**C Shikimate metabolism (AROM) inhibitors**

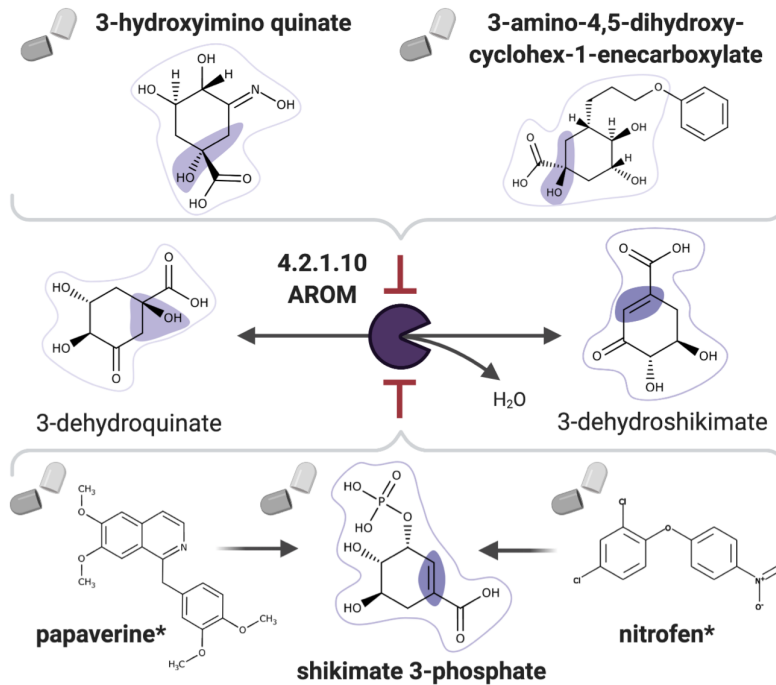

# Figure 7

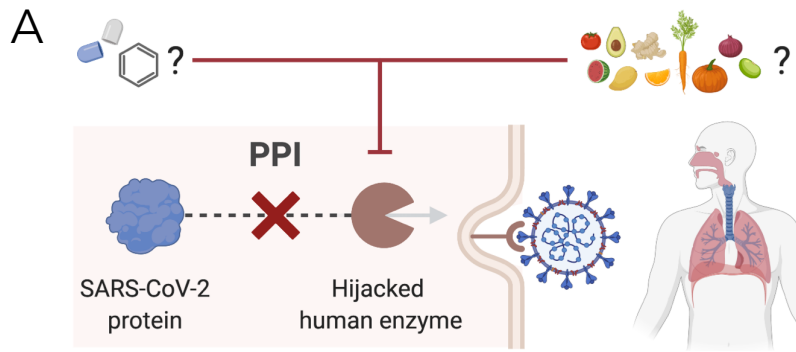

**B Reverse transcriptase inhibitor**

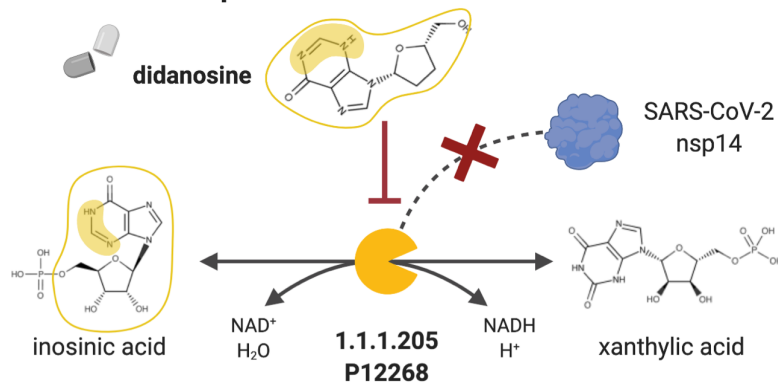

**C Histone deacetylase 2 (HDAC2) inhibitors**

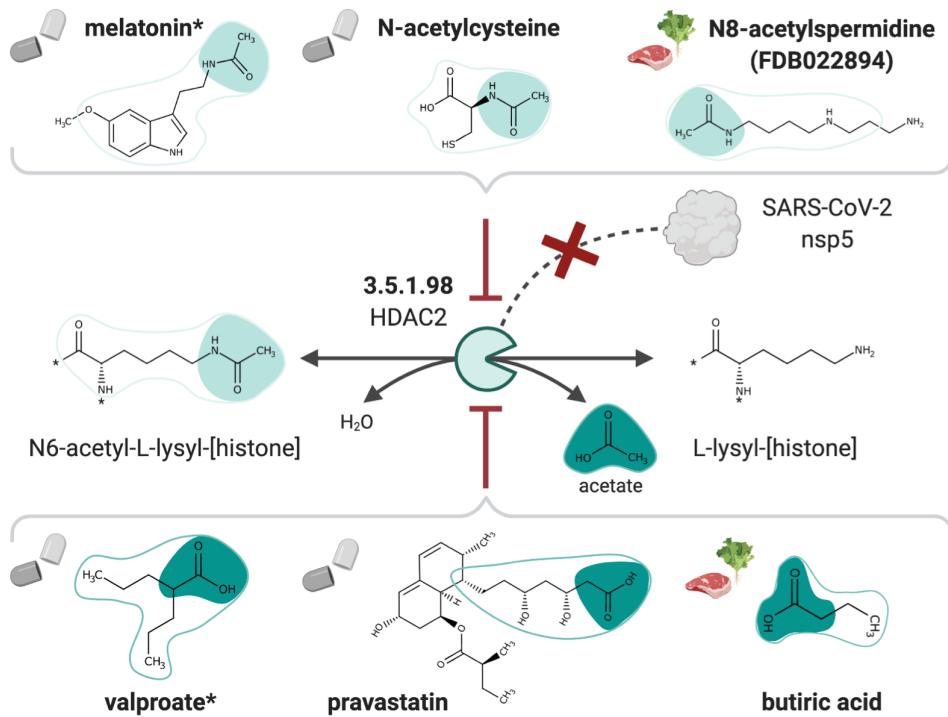

# Figure S1

A

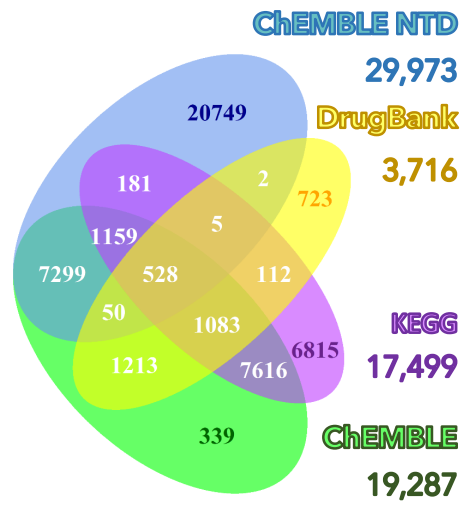

B

1-(piperidin-4-ylmethyl)-3-quinolin-3-ylpyrazolo[3,4-d]pyrimidin-4-amine  
Nc1ncnc2c1c(nn2CC1CCNCC1)c1cnc2c(c1)cccc2

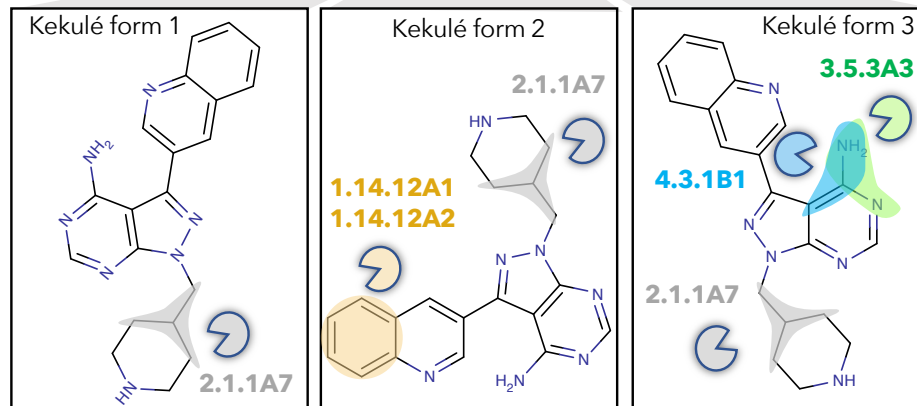

# Figure S2

A

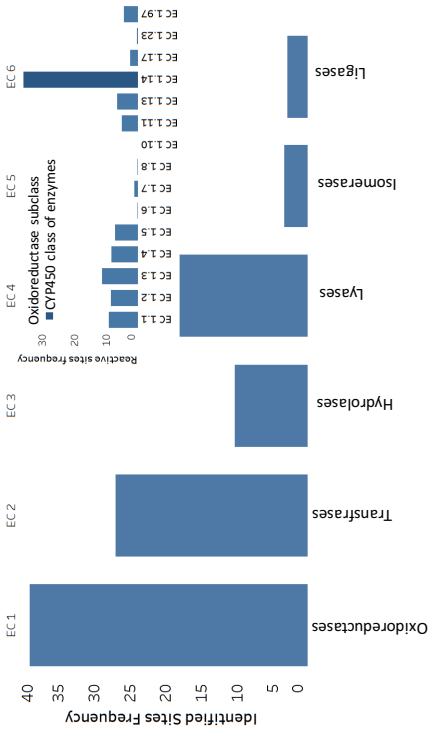

B

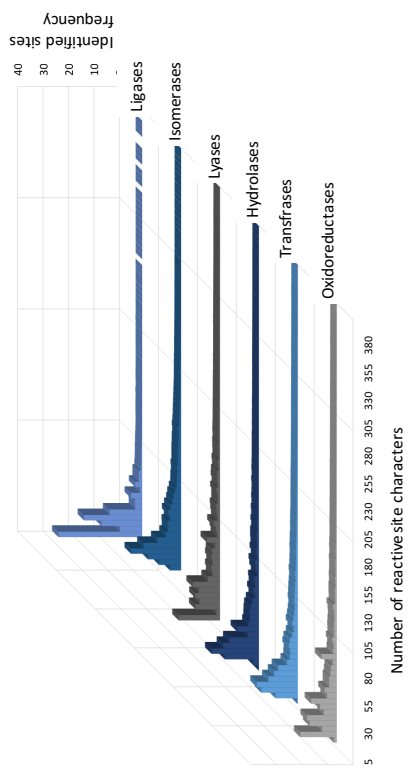

C

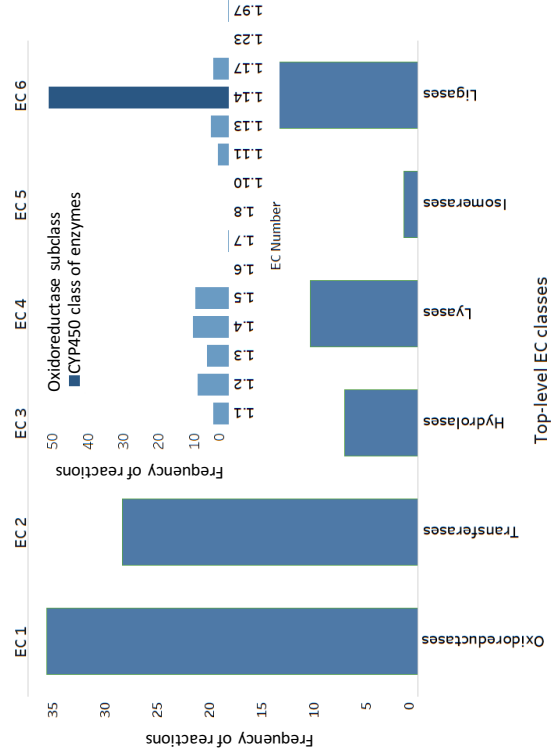

D

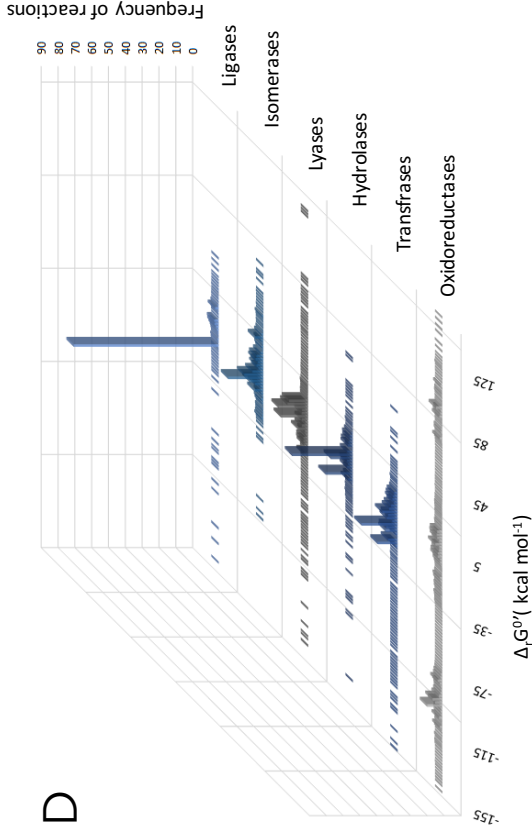

# Figure S3

A

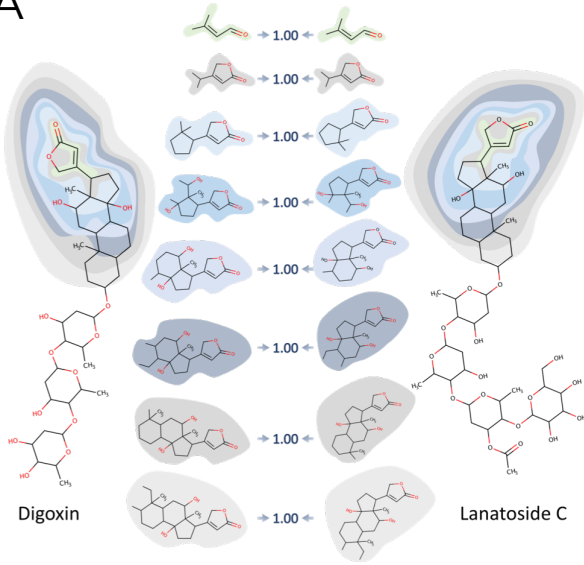

B

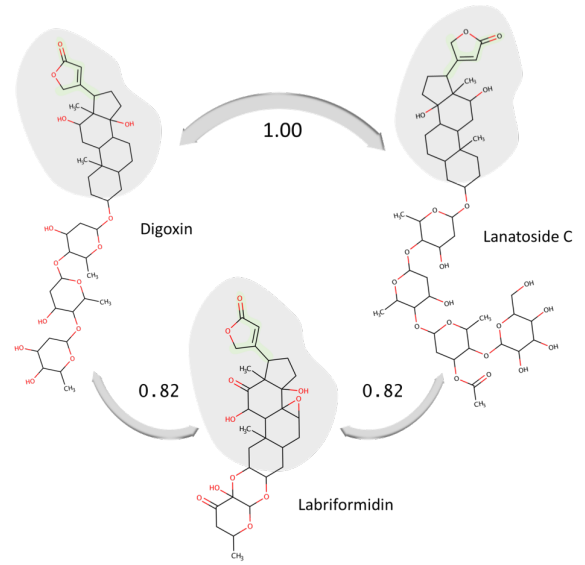

C

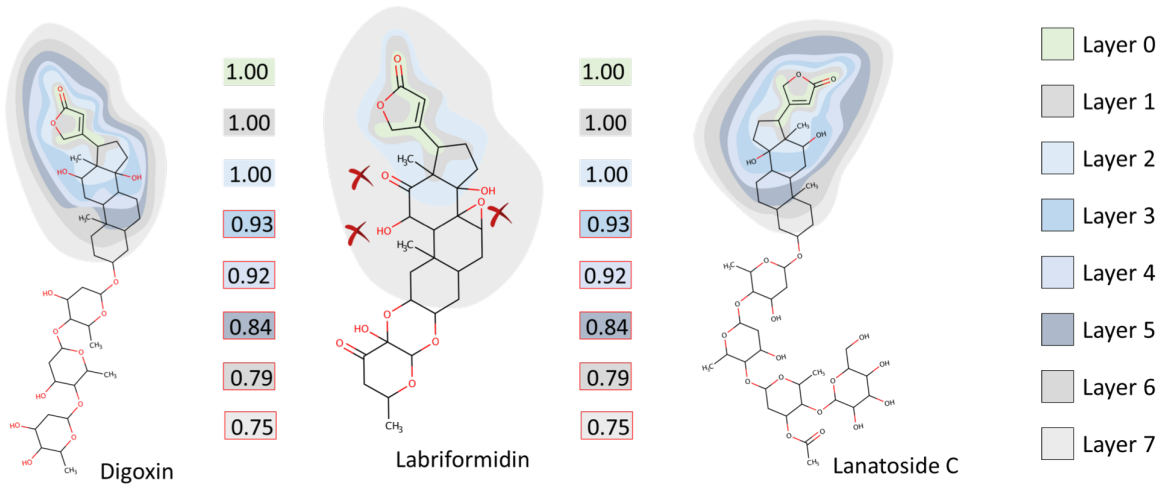

# Figure S4

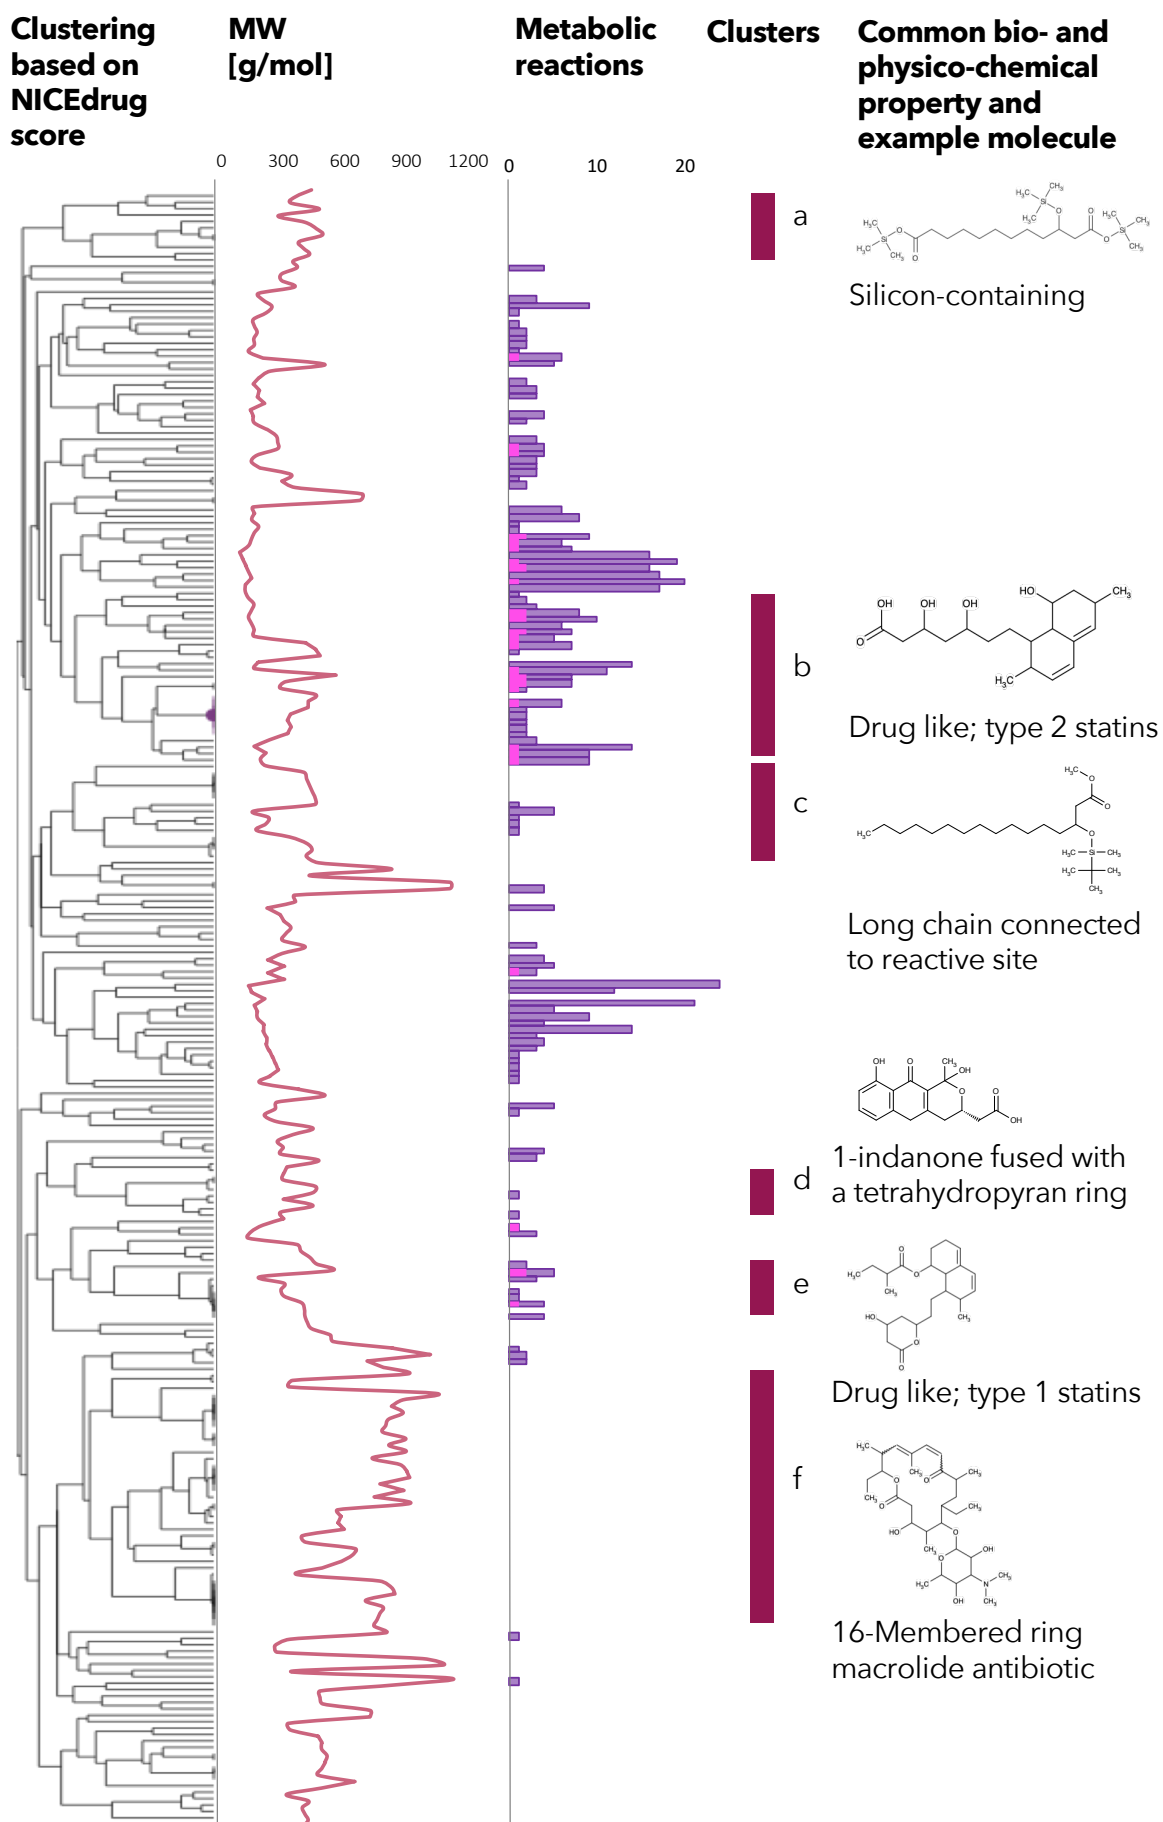

# Figure S5

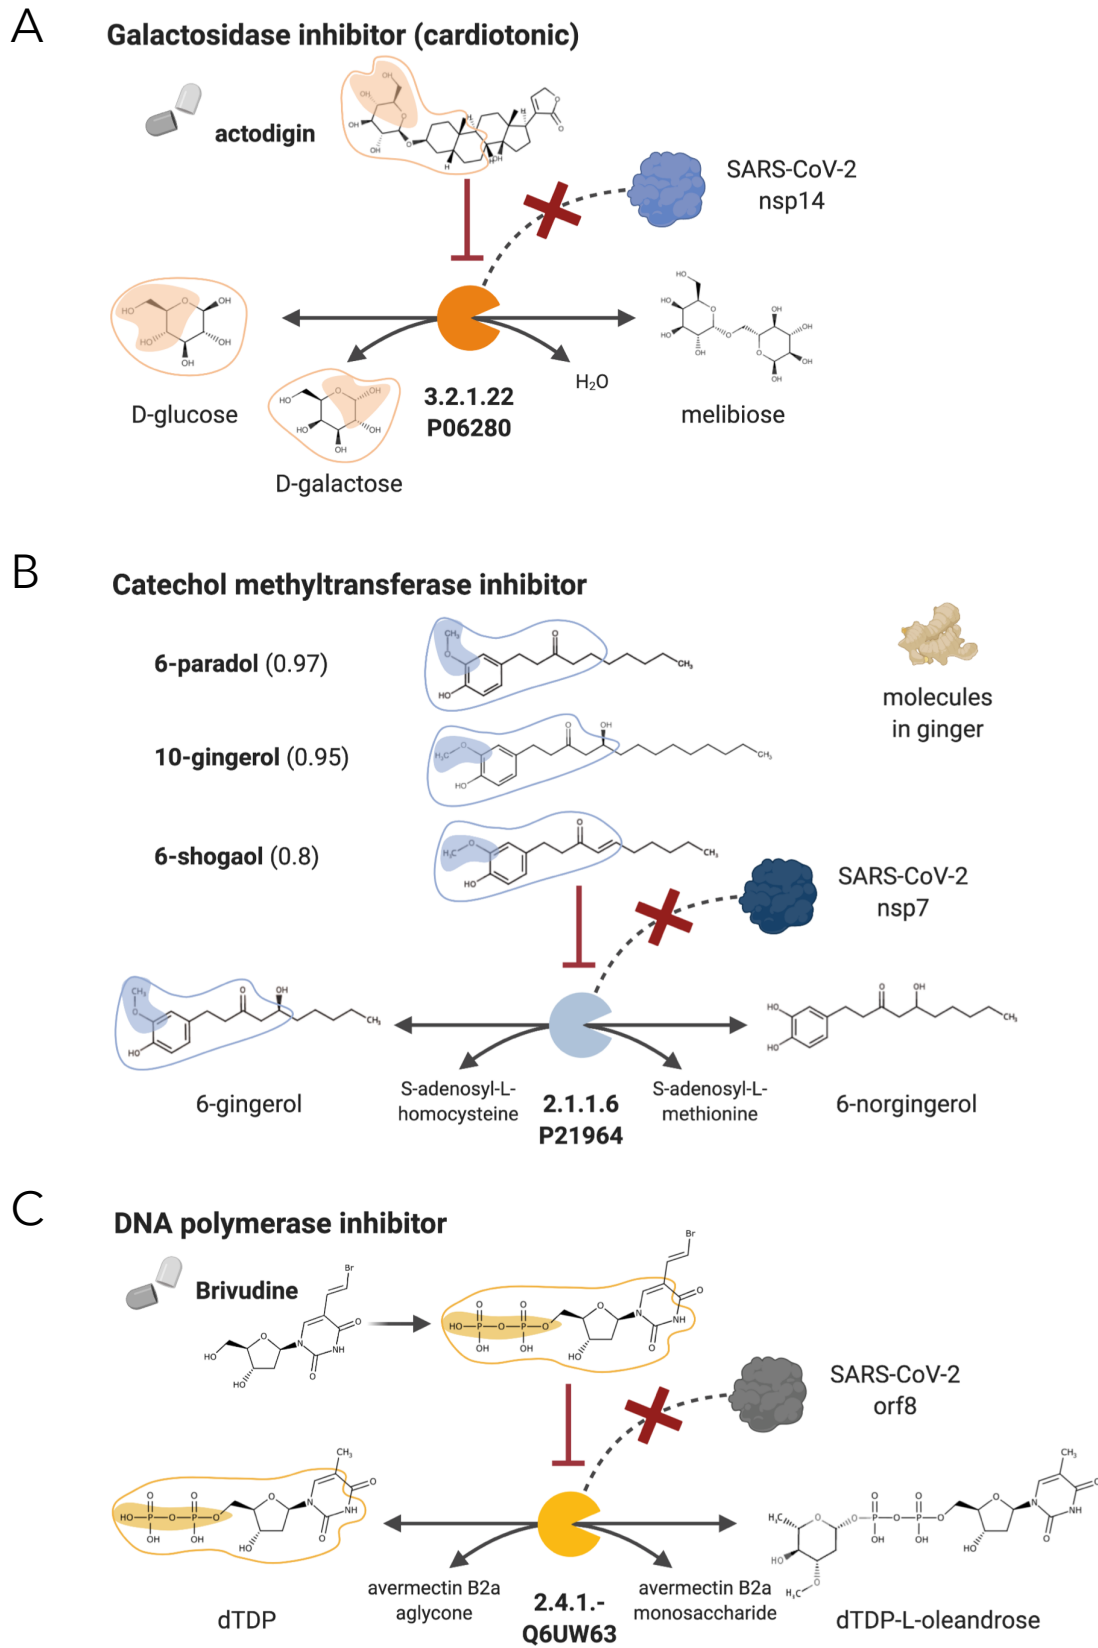

# Figure S6

## Angiotensin-converting enzyme 2 (ACE2) inhibitors

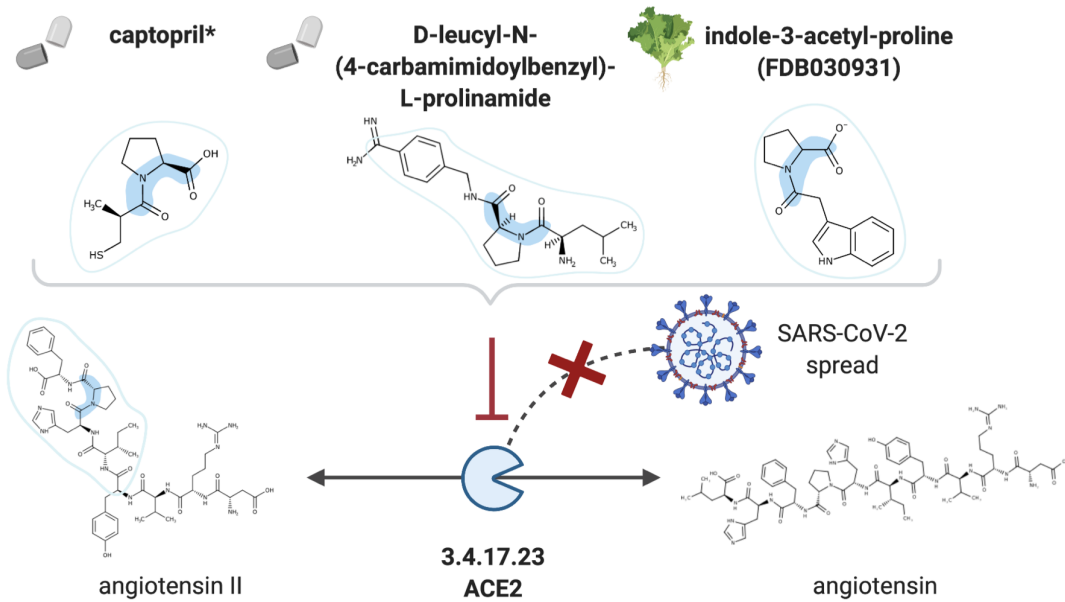

Source: https://www.biorxiv.org/content/10.1101/2020.05.28.120782v2.full.pdf
